# Supplementary material for: Continence problems and mental health in adolescents from a UK cohort
Source: bioRxiv or medRxiv preprint supplement (doi:10.1101/2022.12.07.22283198), 2022-12-07
Supplement: Supplementary file [file media-1.pdf]

## Supplementary material

**Table S1. Derivation of exposure variables used from Avon Longitudinal Study of Parents and Children (ALSPAC)**

| Data collection                                        | ALSPAC variable                                     | Question(s)/measure(s)                                                                                                           | Responses                                                                                                                                            | Final variable coding                     |
|--------------------------------------------------------|-----------------------------------------------------|----------------------------------------------------------------------------------------------------------------------------------|------------------------------------------------------------------------------------------------------------------------------------------------------|-------------------------------------------|
| <b>Incontinence</b>                                    |                                                     |                                                                                                                                  |                                                                                                                                                      |                                           |
| ALSPAC 'travelling, leisure, and school' questionnaire | <b>How often does the following happen to you?</b>  |                                                                                                                                  |                                                                                                                                                      |                                           |
|                                                        | ccp550                                              | <i>Daytime wetting</i><br>Wet yourself during the day?                                                                           | 1: Never<br>2: Less than once per week<br>3: Once a week<br>4: 2-5-times a week<br>5: Nearly everyday<br>6: More than once a day<br>-10, -1: Missing | Recode (1=0) (1/6=1)<br>0: No<br>1: Yes   |
|                                                        | ccp551                                              | <i>Bedwetting</i><br>Wet the bed at night?                                                                                       |                                                                                                                                                      |                                           |
| ccp552                                                 | <i>Soiling</i><br>Dirty your pants during the day?  |                                                                                                                                  |                                                                                                                                                      |                                           |
| <b>Lower urinary tract symptoms</b>                    |                                                     |                                                                                                                                  |                                                                                                                                                      |                                           |
| ALSPAC 'travelling, leisure, and school' questionnaire | <b>Over the last two weeks, how often have you:</b> |                                                                                                                                  |                                                                                                                                                      |                                           |
|                                                        | ccp520                                              | <i>Urgency</i><br>Had the sudden feeling you need a wee and had to dash to the toilet?                                           | 1: Never<br>2: A few times<br>3: Quite often<br>4: A lot<br>-10, -1: Missing                                                                         | Recode (1,2=0) (3/4=1)<br>0: No<br>1: Yes |
|                                                        | ccp521                                              | <i>Frequent urination</i><br>Had to go to the toilet for a wee more than seven times a day?                                      |                                                                                                                                                      |                                           |
|                                                        | ccp522                                              | <i>Low voided volume</i><br>Passed only a small amount when you went for a wee?                                                  |                                                                                                                                                      |                                           |
|                                                        | ccp524                                              | <i>Voiding postponement</i><br>Avoided going for a wee until the last moment because you were concentrating on other activities? |                                                                                                                                                      |                                           |
| ccp527                                                 | <i>Nocturia</i><br>Woken up to go for a wee?        |                                                                                                                                  |                                                                                                                                                      |                                           |

**Table S2. Derivation of outcome variables used from Avon Longitudinal Study of Parents and Children (ALSPAC)**

| Data collection                               | ALSPAC Variable | Question(s)/measure(s)                                                                                                             | Responses                                                                                                         | Final variable coding                                                                                                                                                                                                                                    |
|-----------------------------------------------|-----------------|------------------------------------------------------------------------------------------------------------------------------------|-------------------------------------------------------------------------------------------------------------------|----------------------------------------------------------------------------------------------------------------------------------------------------------------------------------------------------------------------------------------------------------|
| <b>Common mental disorders</b>                |                 |                                                                                                                                    |                                                                                                                   |                                                                                                                                                                                                                                                          |
| Clinical Interview Schedule-Revised* (CIS-R)* | FJCI050         | Total CIS-R score                                                                                                                  | Continuous variable (range: 0-39)                                                                                 | Recode (<12=0) (≥12=1)<br>0: No<br>1: Yes                                                                                                                                                                                                                |
| <b>Depression</b>                             |                 |                                                                                                                                    |                                                                                                                   |                                                                                                                                                                                                                                                          |
| Short Moods and Feelings Questionnaire*       | CCXD917         | High depressive symptoms                                                                                                           | Continuous variable (range: 0-26)<br>-10, -1: Missing                                                             | Recode (<11=0), (≥11=1)<br>0: No<br>1: Yes                                                                                                                                                                                                               |
| CIS-R*                                        | FJCI1001        | ICD-10 diagnosis of depression (any severity: mild, moderate, or severe)                                                           | 0: Not diagnosed<br>1: Diagnosed<br>-10, -4, -1: Missing                                                          | 0: No<br>1: Yes                                                                                                                                                                                                                                          |
| <b>Anxiety Symptoms</b>                       |                 |                                                                                                                                    |                                                                                                                   |                                                                                                                                                                                                                                                          |
| CIS-R*                                        | FJCI602         | Presence of GAD symptoms                                                                                                           | Binary variable<br>0: No<br>1: Yes<br>-10, -4, -1: Missing                                                        | 0: No<br>1: Yes                                                                                                                                                                                                                                          |
| Anxiety Sensitivity Index*                    | FJLE220         | Physical anxiety subscale score                                                                                                    | Continuous variable (range: 10-50)<br>-10, -4, -1: Missing                                                        | Continuous variable                                                                                                                                                                                                                                      |
|                                               | FJLE221         | Mental anxiety subscale score                                                                                                      | Continuous variable (range: 8-40)<br>-10, -4, -1: Missing                                                         | Continuous variable                                                                                                                                                                                                                                      |
| <b>Self-Harm</b>                              |                 |                                                                                                                                    |                                                                                                                   |                                                                                                                                                                                                                                                          |
| CIS-R*                                        | FJCI369         | Have you ever hurt yourself on purpose in any way (e.g., by taking an overdose of pills or by cutting yourself)?                   | 1: No<br>2: Yes<br>-10, -4, -1: Missing                                                                           | If FJCI369 = 2, recode FJCI370 (1=0) (2/5=1):<br>0: No<br>1: Yes<br>If FJCI369 = 1, recode FJCI370 (=0)                                                                                                                                                  |
|                                               | FJCI370         | How many times have you hurt yourself on purpose in the last year?                                                                 | 1: None<br>2: Once<br>3: 2-5<br>4: 6-10<br>5: >10<br>-10, -4, -1: Missing                                         |                                                                                                                                                                                                                                                          |
|                                               | FJCI371         | During the past week, have you thought about hurting yourself on purpose?                                                          | 1: No<br>2: Yes, but never commit suicide<br>3: Yes<br>-10, -4, -1: Missing                                       | Recode (1=0) (1/2=1)<br>0: No<br>1: Yes                                                                                                                                                                                                                  |
| <b>Excessive exercise</b>                     |                 |                                                                                                                                    |                                                                                                                   |                                                                                                                                                                                                                                                          |
| ALSPAC 'Your changing life' questionnaire*    | cct4105         | <b>During the past year:</b><br>How often did you do any exercise (going to the gym, brisk walking, or any other sports activity)? | 1: 5 or more times a week<br>2: 1-4 times a week<br>3: 1-3 times a month<br>4: Less than once a month<br>5: Never | <b>Any excessive exercise:</b><br><i>Exercise must be accompanied by intent to control weight and/or impairment.</i><br><br>Recode cct4105 (5=0) (1/4=1)<br>Recode cct4106 (3=0) (1/2=1)<br>Recode cct4107 (3=0) (1/2=1)<br>Recode cct4108 (0=0) (1/3=1) |
|                                               | cct4106         | Was it difficult for you to do your work or schoolwork because of the amount of time that you were exercising?                     | 1: Yes, sometimes<br>2: Yes, frequently<br>3: No                                                                  |                                                                                                                                                                                                                                                          |

Supplementary material for: *Prospective relationships between continence problems and common mental health disorders in adolescents from a UK cohort*

| Data collection                           | ALSPAC Variable | Question(s)/measure(s)                                                                                                     | Responses                                                                                                              | Final variable coding                                                                                                                                                                                                                                                                                                                                                                                                                                                                                                       |
|-------------------------------------------|-----------------|----------------------------------------------------------------------------------------------------------------------------|------------------------------------------------------------------------------------------------------------------------|-----------------------------------------------------------------------------------------------------------------------------------------------------------------------------------------------------------------------------------------------------------------------------------------------------------------------------------------------------------------------------------------------------------------------------------------------------------------------------------------------------------------------------|
|                                           | cct4107         | Did you exercise in order to lose weight or avoid gaining weight?                                                          | 1: Yes, sometimes<br>2: Yes, frequently<br>3: No                                                                       | 0: No (if cct41005, cct4106, cct41007 or cct4108 = 0)<br>1: Yes (if cct41007 = 1 & cct4108 = 1, or if cct41007 = 1 & cct4106 = 1)<br><br><b>DSM-5<sup>†</sup> excessive exercise:</b><br><br>Recode cct4105 (3/5=0) (1/2=1)<br>Recode cct4106 (3=0) (1/2=1)<br>Recode cct4107 (3=0) (1/2=1), replace = 0 if cct4105 = 0<br>Recode cct4108 (0/1=0) (2/3=1), replace = 0 if cct4105 = 0<br><br>0: (if cct41005, cct4106, cct41007 or cct4108 = 0)<br>1: Yes (if cct41007 = 1 & cct4108 = 1, or if cct41007 = 1 & cct4106 = 1) |
|                                           | cct4108         | Did you feel guilty after missing an exercise session?                                                                     | 0: No<br>1: Yes, sometimes<br>2: Yes, frequently<br>3: Did not miss any exercise sessions                              |                                                                                                                                                                                                                                                                                                                                                                                                                                                                                                                             |
| <b>Fasting</b>                            |                 |                                                                                                                            |                                                                                                                        |                                                                                                                                                                                                                                                                                                                                                                                                                                                                                                                             |
| ALSPAC 'Your changing life' questionnaire | cct4110         | During the past year, how often did you fast (not eat for at least a day) to lose weight or avoid gaining weight?          | 1: Never<br>2: Less than once a month<br>3: 1-3 times a month<br>4: Once a week<br>5: 2 or more times a week           | <b>Any fasting:</b><br>Recode (1=0) (2/5=1)<br>0: No<br>1: Yes<br><br><b>DSM-5<sup>†</sup> fasting:</b><br>Recode (1/3=0) (4/5=1)<br>0: No<br>1: Yes                                                                                                                                                                                                                                                                                                                                                                        |
| <b>Purging</b>                            |                 |                                                                                                                            |                                                                                                                        |                                                                                                                                                                                                                                                                                                                                                                                                                                                                                                                             |
| ALSPAC 'Your changing life' questionnaire | cct4112         | How often did you make yourself throw up (vomit) to lose weight or avoid gaining weight?                                   | 1: Never<br>2: Less than once a month<br>3: 1-3 times a month<br>4: Once a week<br>5: 2-6 times a week<br>6: Every day | <b>Any purging</b><br>Recode cct4112 (1=0) (2/6=1)<br>Recode cct4115 (3=0) (1/2=1)<br>Recode cct4116 (1=0) (2/6=1), replace = 0 if cct4115 = 0                                                                                                                                                                                                                                                                                                                                                                              |
|                                           | cct4115         | Did you take laxatives or other tablets or medicines (diet pills or water tablets) to lose weight or avoid gaining weight? | 1: Yes, laxative<br>2: Yes, other<br>3: Never                                                                          | 0: No (if cct4112 & cct4116=0)<br>1: Yes (if cct4112 or cct4116=1)                                                                                                                                                                                                                                                                                                                                                                                                                                                          |
|                                           | cct4116         | How often did you take laxatives or other tablets or medicines to lose weight or avoid gaining weight?                     | 1: Never<br>2: Less than once a month<br>3: 1-3 times a month<br>4: Once a week<br>5: 2-6 times a week<br>6: Every day | <b>DSM-5<sup>†</sup> purging</b><br>Recode cct4112 (1/3=0) (4/6=1)<br>Recode cct4115 (3=0) (1/2=1)<br>Recode cct4116 (1/3=0) (4/6=1), replace = 0 if cct4115 = 0<br><br>0: No (if cct4112 & cct4116=0)<br>1: Yes (if cct4112 or cct4116=1)                                                                                                                                                                                                                                                                                  |
| <b>Binge-eating</b>                       |                 |                                                                                                                            |                                                                                                                        |                                                                                                                                                                                                                                                                                                                                                                                                                                                                                                                             |
|                                           |                 | <b>During the past year:</b>                                                                                               |                                                                                                                        |                                                                                                                                                                                                                                                                                                                                                                                                                                                                                                                             |

Supplementary material for: *Prospective relationships between continence problems and common mental health disorders in adolescents from a UK cohort*

| Data collection                                             | ALSPAC Variable | Question(s)/measure(s)                                                                 | Responses                                                                                                   | Final variable coding                                                                                                                                                                                                                                             |
|-------------------------------------------------------------|-----------------|----------------------------------------------------------------------------------------|-------------------------------------------------------------------------------------------------------------|-------------------------------------------------------------------------------------------------------------------------------------------------------------------------------------------------------------------------------------------------------------------|
| ALSPAC 'Your changing life' questionnaire                   | cct4120         | During the past year, how often did you go on an eating binge?                         | 1: Less than once a month<br>2: 1-3 times a month<br>3: Once a week<br>4: More than once a week<br>5: Never | <b>Any binge-eating</b><br><i>Binge-eating must be accompanied by loss of control.</i><br><br>Recode cct4120 (5=0), (1/4=1)<br>Recode cct4125 (3=0) (1/2=1)                                                                                                       |
|                                                             | cct4125         | Did you feel out of control, like you couldn't stop eating even if you wanted to stop? | 1: Yes, usually<br>2: Yes, sometimes<br>3: No                                                               | 0: No (if cct4120 or cct4125=0)<br>1: Yes (if cct4112 & cct4125=1)<br><br><b>DSM-5<sup>†</sup> Binge-eating</b><br>Recode cct4120 (5=0) (1/2=0) (3/4=1)<br>Recode cct4125 (3=0) (1/2=1)<br><br>0: No (if cct4120 or cct4125=0)<br>1: Yes (if cct4112 & cct4125=1) |
| <b>Any disordered eating at any frequency</b>               |                 |                                                                                        |                                                                                                             | <b>Presence of any fasting, purging, binge-eating, or excessive exercise:</b><br>0: No<br>1: Yes                                                                                                                                                                  |
| <b>Any disordered eating at DSM-5<sup>†</sup> frequency</b> |                 |                                                                                        |                                                                                                             | <b>Presence of any DSM-5<sup>†</sup> fasting, DSM-5<sup>†</sup> purging, DSM-5<sup>†</sup> binge-eating, or DSM-5<sup>†</sup> excessive exercise:</b><br>0: No<br>1: Yes                                                                                          |

\*Completed at Teen Focus 4 Clinic. †Behaviour occurs  $\geq 1$  per week. *Abbreviation: ALSPAC, Avon Longitudinal Study of Parents and Children; DSM-5, Diagnostic and Statistical Manual of Mental Disorders, Fifth Edition.*

**Table S3. Derivation of confounder variables used from Avon Longitudinal Study of Parents and Children (ALSPAC)**

| Data collection                                                   | ALSPAC Variable                           | Question(s)/measure(s)                                                                                                                                                                                                                                                                                                                                                                            | Responses                                                                                                                                                                                                                                                             | Final variable coding                                                                                                                                                                                                                                   |
|-------------------------------------------------------------------|-------------------------------------------|---------------------------------------------------------------------------------------------------------------------------------------------------------------------------------------------------------------------------------------------------------------------------------------------------------------------------------------------------------------------------------------------------|-----------------------------------------------------------------------------------------------------------------------------------------------------------------------------------------------------------------------------------------------------------------------|---------------------------------------------------------------------------------------------------------------------------------------------------------------------------------------------------------------------------------------------------------|
| <b>Child Sex</b>                                                  |                                           |                                                                                                                                                                                                                                                                                                                                                                                                   |                                                                                                                                                                                                                                                                       |                                                                                                                                                                                                                                                         |
| Recorded at birth                                                 | kz021                                     | Collected from fieldworkers visiting maternity units at birth                                                                                                                                                                                                                                                                                                                                     | 1: male<br>2: female<br>-1: not known                                                                                                                                                                                                                                 | Recode:<br>0: male<br>1: female                                                                                                                                                                                                                         |
| <b>Parental social class</b>                                      |                                           |                                                                                                                                                                                                                                                                                                                                                                                                   |                                                                                                                                                                                                                                                                       |                                                                                                                                                                                                                                                         |
| 1991 British Office of Population and Census Statistics job codes | c755<br>c765                              | Derived variable from questions: <ul style="list-style-type: none"> <li>Actual job, occupation, trade or profession</li> <li>Please tick which of the following apply to you: foreman, manager, supervisor, leading hand, self-employed, none of these</li> <li>Type of industry or service given (main things done in job)</li> </ul>                                                            | 1: I<br>2: II<br>3: III (non-manual)<br>4: III (manual)<br>5: IV<br>6: V<br>65: Armed forces<br>-1: missing                                                                                                                                                           | Recode (1/3=0) (4/6=1) (else=.)<br><br>Select highest parental social class i.e., if one parent is non-manual then social class=0:<br><br>0: Non-manual: professional, managerial, or skilled professions<br>1: Manual: partly or unskilled occupations |
| <b>Ethnicity</b>                                                  |                                           |                                                                                                                                                                                                                                                                                                                                                                                                   |                                                                                                                                                                                                                                                                       |                                                                                                                                                                                                                                                         |
|                                                                   | c804                                      |                                                                                                                                                                                                                                                                                                                                                                                                   | -1: Missing<br>1: White<br>2: Non-White                                                                                                                                                                                                                               | Recode:<br>0: White<br>1: Non-White                                                                                                                                                                                                                     |
| <b>Maternal education</b>                                         |                                           |                                                                                                                                                                                                                                                                                                                                                                                                   |                                                                                                                                                                                                                                                                       |                                                                                                                                                                                                                                                         |
|                                                                   | c645a                                     | Derived variable: mother's highest educational qualification                                                                                                                                                                                                                                                                                                                                      | 1: CSE/none<br>2: Vocational<br>3: O-level<br>4: A-level<br>5: Degree<br>-1: Missing                                                                                                                                                                                  | Recode (4/5=0) (3=1) (1/2=2)<br>0 = A-level or greater<br>1 = O-level<br>2 = CSE, vocational or less                                                                                                                                                    |
| <b>Home ownership</b>                                             |                                           |                                                                                                                                                                                                                                                                                                                                                                                                   |                                                                                                                                                                                                                                                                       |                                                                                                                                                                                                                                                         |
|                                                                   | q2010                                     | <b>Is your home:</b> <ol style="list-style-type: none"> <li>being bought/mortgaged</li> <li>being bought from council</li> <li>owned - with no mortgage to pay</li> <li>rented from council</li> <li>rented from private landlord - furnished</li> <li>rented from private landlord - unfurnished</li> <li>rented from housing association</li> <li>other (please tick &amp; describe)</li> </ol> | 0: Being bought/mortgaged<br>1: Being bought from council<br>2: Owned with no mortgage to pay<br>3: Rented from council<br>4: Rented from private landlord furnished<br>5: Rented from private landlord unfurnished<br>6: Rented from housing association<br>7: other | Recode (0/2=0) (4/5=0) (3=1) (6/7=1)<br>0 = Mortgage/owned/private rented<br>1 = rent/other                                                                                                                                                             |
| <b>Material hardship</b>                                          |                                           |                                                                                                                                                                                                                                                                                                                                                                                                   |                                                                                                                                                                                                                                                                       |                                                                                                                                                                                                                                                         |
| ALSPAC hardship items                                             | r9000<br>r9001<br>r9002<br>r9003<br>r9004 | <b>How difficult at the moment do you find it to afford these items:</b> <ol style="list-style-type: none"> <li>food</li> <li>clothing</li> <li>heating</li> <li>rent or mortgage</li> <li>things you need for your children</li> </ol>                                                                                                                                                           | 1: Very difficult<br>2: Fairly difficult<br>3: Slightly difficult<br>4: Not difficult<br>5: Paid directly by social security                                                                                                                                          | Recode r9000-r9004 (5=4)<br>20-(r9000+r9001+r9002+r9003 +9004) = summed score (range: 0-15)<br><br><b>Mode imputation:</b> Replace summed score =. with mode score if at least at least one of r9000-9004 answered                                      |

Supplementary material for: *Prospective relationships between continence problems and common mental health disorders in adolescents from a UK cohort*

| Data collection                                                                         | ALSPAC Variable        | Question(s)/measure(s)                                                        | Responses                                                                                                                                                                                                                                                                          | Final variable coding<br>(Higher scores = more material hardship)                                                                                                                        |
|-----------------------------------------------------------------------------------------|------------------------|-------------------------------------------------------------------------------|------------------------------------------------------------------------------------------------------------------------------------------------------------------------------------------------------------------------------------------------------------------------------------|------------------------------------------------------------------------------------------------------------------------------------------------------------------------------------------|
| <b>Family size</b>                                                                      |                        |                                                                               |                                                                                                                                                                                                                                                                                    |                                                                                                                                                                                          |
|                                                                                         | b032                   | Derived using parity as proxy.                                                | Continuous variable (range: 0-22)                                                                                                                                                                                                                                                  | Recode (0/2=0) (3/22=1)<br>0 = <3 children<br>1 = ≥3 children                                                                                                                            |
| <b>Developmental delay at 18-month</b>                                                  |                        |                                                                               |                                                                                                                                                                                                                                                                                    |                                                                                                                                                                                          |
| Adapted from Denver Developmental Screening Test ( <i>Pediatrics</i> . 1992;89(1):91-7) | kd680                  | Derived variable: Total ALSPAC development score at 18 months (complete case) | Continuous score<br>-102: Not in correct age range<br>-101: Missing                                                                                                                                                                                                                | Continuous score<br>(-101, -102 = missing)                                                                                                                                               |
| <b>Child IQ</b>                                                                         |                        |                                                                               |                                                                                                                                                                                                                                                                                    |                                                                                                                                                                                          |
| Adapted from Wechsler Intelligence Scale for Children (3 <sup>rd</sup> ed)              | f8ws112                | Derived variable: Total IQ score at 8-years                                   | Continuous score<br>-3: Not enough subtests done<br>-2 Did not start WISC                                                                                                                                                                                                          | Continuous score<br>(-3, -2 = missing)                                                                                                                                                   |
| <b>Stressful life events</b>                                                            |                        |                                                                               |                                                                                                                                                                                                                                                                                    |                                                                                                                                                                                          |
| ALSPAC 'life events inventory' questionnaire                                            |                        | <b>Since the study child's 9<sup>th</sup> birthday:</b>                       |                                                                                                                                                                                                                                                                                    | Recode r5000-r5044 (4=0) (0/3=1)<br>Create summed score (range: 0-45)<br><b>Mode imputation:</b> Replace summed score =. with mode score if at least at least one of r5000-5044 answered |
|                                                                                         | r5000                  | Respondent's husband/partner died                                             | 0: Relevant text but no box ticked<br>1: Yes, since study child was 9 or 10<br>2: Yes, since child's 11 <sup>th</sup> birthday<br>3: Yes, both when the study child was 10/11 and since 9 <sup>th</sup> birthday<br>4: No, did not happen<br>-10: Not completed<br>-1: No response |                                                                                                                                                                                          |
|                                                                                         | r5001                  | One of respondent's children has died                                         |                                                                                                                                                                                                                                                                                    |                                                                                                                                                                                          |
|                                                                                         | r5002                  | Respondent's friend/relative has died                                         |                                                                                                                                                                                                                                                                                    |                                                                                                                                                                                          |
|                                                                                         | r5003                  | One of respondent's children has been ill                                     |                                                                                                                                                                                                                                                                                    |                                                                                                                                                                                          |
|                                                                                         | r5004                  | Respondent's husband/partner has been ill                                     |                                                                                                                                                                                                                                                                                    |                                                                                                                                                                                          |
|                                                                                         | r5005                  | One of respondent's children has been ill                                     |                                                                                                                                                                                                                                                                                    |                                                                                                                                                                                          |
|                                                                                         | r5006                  | Respondent's friend/relative has been ill                                     |                                                                                                                                                                                                                                                                                    |                                                                                                                                                                                          |
|                                                                                         | r5007                  | Respondent has been admitted to hospital                                      |                                                                                                                                                                                                                                                                                    |                                                                                                                                                                                          |
|                                                                                         | r5008                  | Respondent has been in trouble with the law                                   |                                                                                                                                                                                                                                                                                    |                                                                                                                                                                                          |
|                                                                                         | r5009                  | Respondent has been divorced                                                  |                                                                                                                                                                                                                                                                                    |                                                                                                                                                                                          |
|                                                                                         | r5010                  | Respondent's husband/partner didn't want their child                          |                                                                                                                                                                                                                                                                                    |                                                                                                                                                                                          |
|                                                                                         | r5011                  | Respondent has been very ill                                                  |                                                                                                                                                                                                                                                                                    |                                                                                                                                                                                          |
|                                                                                         | r5012                  | Respondent's husband/partner lost his job                                     |                                                                                                                                                                                                                                                                                    |                                                                                                                                                                                          |
|                                                                                         | r5013                  | Respondent's husband/partner had problems at work                             |                                                                                                                                                                                                                                                                                    |                                                                                                                                                                                          |
|                                                                                         | r5014                  | Respondent had problems at work                                               |                                                                                                                                                                                                                                                                                    |                                                                                                                                                                                          |
|                                                                                         | r5015                  | Respondent lost their job                                                     |                                                                                                                                                                                                                                                                                    |                                                                                                                                                                                          |
|                                                                                         | r5016                  | Respondent's husband/partner went away                                        |                                                                                                                                                                                                                                                                                    |                                                                                                                                                                                          |
|                                                                                         | r5017                  | Respondent's husband/partner was in trouble                                   |                                                                                                                                                                                                                                                                                    |                                                                                                                                                                                          |
|                                                                                         | r5018                  | Respondent separated from husband/partner                                     |                                                                                                                                                                                                                                                                                    |                                                                                                                                                                                          |
|                                                                                         | r5019                  | Respondent's income was reduced                                               |                                                                                                                                                                                                                                                                                    |                                                                                                                                                                                          |
|                                                                                         | r5020                  | Respondent argued with their husband/partner                                  |                                                                                                                                                                                                                                                                                    |                                                                                                                                                                                          |
|                                                                                         | r5021                  | Respondent argued with their family/friends                                   |                                                                                                                                                                                                                                                                                    |                                                                                                                                                                                          |
|                                                                                         | r5022                  | Respondent moved house                                                        |                                                                                                                                                                                                                                                                                    |                                                                                                                                                                                          |
|                                                                                         | r5023                  | Respondent's husband/partner was physically cruel to them                     |                                                                                                                                                                                                                                                                                    |                                                                                                                                                                                          |
|                                                                                         | r5024                  | Respondent became homeless                                                    |                                                                                                                                                                                                                                                                                    |                                                                                                                                                                                          |
|                                                                                         | r5025                  | Respondent had a major financial problem                                      |                                                                                                                                                                                                                                                                                    |                                                                                                                                                                                          |
| r5026                                                                                   | Respondent got married |                                                                               |                                                                                                                                                                                                                                                                                    |                                                                                                                                                                                          |

Supplementary material for: *Prospective relationships between continence problems and common mental health disorders in adolescents from a UK cohort*

| Data collection                                                                                                   | ALSPAC Variable                                  | Question(s)/measure(s)                                                    | Responses                                                                                                                              | Final variable coding                                                                                                                                                                                                                                                                             |
|-------------------------------------------------------------------------------------------------------------------|--------------------------------------------------|---------------------------------------------------------------------------|----------------------------------------------------------------------------------------------------------------------------------------|---------------------------------------------------------------------------------------------------------------------------------------------------------------------------------------------------------------------------------------------------------------------------------------------------|
|                                                                                                                   | r5027                                            | Respondent's husband/partner was physically cruel to their children       |                                                                                                                                        |                                                                                                                                                                                                                                                                                                   |
|                                                                                                                   | r5028                                            | Respondent was physically cruel to their children                         |                                                                                                                                        |                                                                                                                                                                                                                                                                                                   |
|                                                                                                                   | r5029                                            | Respondent attempted suicide                                              |                                                                                                                                        |                                                                                                                                                                                                                                                                                                   |
|                                                                                                                   | r5030                                            | Respondent was convicted of an offence                                    |                                                                                                                                        |                                                                                                                                                                                                                                                                                                   |
|                                                                                                                   | r5031                                            | Respondent became pregnant                                                |                                                                                                                                        |                                                                                                                                                                                                                                                                                                   |
|                                                                                                                   | r5032                                            | Respondent started a new job                                              |                                                                                                                                        |                                                                                                                                                                                                                                                                                                   |
|                                                                                                                   | r5033                                            | Respondent returned to work                                               |                                                                                                                                        |                                                                                                                                                                                                                                                                                                   |
|                                                                                                                   | r5034                                            | Respondent had a miscarriage                                              |                                                                                                                                        |                                                                                                                                                                                                                                                                                                   |
|                                                                                                                   | r5035                                            | Respondent had an abortion                                                |                                                                                                                                        |                                                                                                                                                                                                                                                                                                   |
|                                                                                                                   | r5036                                            | Respondent has taken an examination                                       |                                                                                                                                        |                                                                                                                                                                                                                                                                                                   |
|                                                                                                                   | r5037                                            | Respondent's husband/partner was emotionally cruel to them                |                                                                                                                                        |                                                                                                                                                                                                                                                                                                   |
|                                                                                                                   | r5038                                            | Respondent's husband/partner has been emotionally cruel to their children |                                                                                                                                        |                                                                                                                                                                                                                                                                                                   |
|                                                                                                                   | r5039                                            | Respondent has been emotionally cruel to their children                   |                                                                                                                                        |                                                                                                                                                                                                                                                                                                   |
|                                                                                                                   | r5040                                            | Respondent's house/car was burgled                                        |                                                                                                                                        |                                                                                                                                                                                                                                                                                                   |
|                                                                                                                   | r5041                                            | Respondent found a new partner                                            |                                                                                                                                        |                                                                                                                                                                                                                                                                                                   |
|                                                                                                                   | r5042                                            | One of respondent's child started school                                  |                                                                                                                                        |                                                                                                                                                                                                                                                                                                   |
|                                                                                                                   | r5043                                            | Respondent's husband/partner started a new job                            |                                                                                                                                        |                                                                                                                                                                                                                                                                                                   |
|                                                                                                                   | r5044                                            | Respondent's pet died                                                     |                                                                                                                                        |                                                                                                                                                                                                                                                                                                   |
| <b>Maternal depression</b>                                                                                        |                                                  |                                                                           |                                                                                                                                        |                                                                                                                                                                                                                                                                                                   |
| Edinburgh Postnatal Depression Scale when child was 11-years ( <i>Br J Psychiatry J Ment Sci.</i> 1987;150:782–6) |                                                  | <b>In the past seven days:</b>                                            |                                                                                                                                        |                                                                                                                                                                                                                                                                                                   |
|                                                                                                                   | r4010                                            | I have been able to laugh and see the funny side of things                | 1: As much as I always could<br>2: Not quite so much now<br>3: Definitely not so much now<br>4: Not at all<br>-10, -1: Missing         | Recode r4010, r4011, r4013: (1=0) (2=1) (2=3) (4=3)<br>Recode r4012, r4014-r4019: (4=0), (3=1) (2=2), (1=3)<br>Sum all 10 items to generate continuous score (range:0-30)<br><br><b>Mode imputation:</b> Replace summed score =. with mode score if at least at least one of r4010-r4019 answered |
|                                                                                                                   | r4011                                            | I have looked forward with enjoyment to things                            | 1: As much as I ever did<br>2: Rather less than I used to<br>3: Definitely less than I used to<br>4: Hardly at all<br>-10, -1: missing |                                                                                                                                                                                                                                                                                                   |
|                                                                                                                   | r4012                                            | I have blamed myself unnecessarily when things when wrong                 | 1: Yes, most of the time<br>2: Yes, some of the time<br>3: Not very often<br>4: Never<br>-10, -1: Missing                              |                                                                                                                                                                                                                                                                                                   |
|                                                                                                                   | r4013                                            | I have been anxious or worried for no good reason                         | 1: No, not at all<br>2: Hardly ever<br>3: Yes, sometimes<br>4: Yes, often<br>-10, -1: Missing                                          |                                                                                                                                                                                                                                                                                                   |
| r4014                                                                                                             | I have felt scared or panicky for no good reason | 1: Yes, quite a lot<br>2: Yes, sometimes                                  |                                                                                                                                        |                                                                                                                                                                                                                                                                                                   |

Supplementary material for: *Prospective relationships between continence problems and common mental health disorders in adolescents from a UK cohort*

| Data collection                                                                                      | ALSPAC Variable         | Question(s)/measure(s)                                                                  | Responses                                                                                                                                                                                                | Final variable coding                                                                                                                                                                                                                                                                                                                        |
|------------------------------------------------------------------------------------------------------|-------------------------|-----------------------------------------------------------------------------------------|----------------------------------------------------------------------------------------------------------------------------------------------------------------------------------------------------------|----------------------------------------------------------------------------------------------------------------------------------------------------------------------------------------------------------------------------------------------------------------------------------------------------------------------------------------------|
|                                                                                                      |                         |                                                                                         | 3: No, not much<br>4: No, not at all<br>-10, -1: Missing                                                                                                                                                 |                                                                                                                                                                                                                                                                                                                                              |
|                                                                                                      | r4015                   | Things have been getting on top of me                                                   | 1: Yes, most of the time I haven't been able to cope<br>2: Yes, sometimes I haven't been coping<br>3: No, most of the time I have coped<br>4: No, I have been coping as well as ever<br>-10, -1: Missing |                                                                                                                                                                                                                                                                                                                                              |
|                                                                                                      | r4016                   | I have been so unhappy that I have had difficulty sleeping                              | 1: Yes, most of the time<br>2: Yes, sometimes<br>3: Not very often<br>4: No, not at all<br>-10, -1: Missing                                                                                              |                                                                                                                                                                                                                                                                                                                                              |
|                                                                                                      | r4017                   | I have felt sad or miserable                                                            | 1: Yes, most of the time<br>2: Yes, sometimes<br>3: Not very often<br>4: No, not at all<br>-10, -1: Missing                                                                                              |                                                                                                                                                                                                                                                                                                                                              |
|                                                                                                      | r4018                   | I have felt so unhappy that I've been crying                                            | 1: Yes, most of the time<br>2: Yes, quite often<br>3: Only occasionally<br>4: Never<br>-10, -1: Missing                                                                                                  |                                                                                                                                                                                                                                                                                                                                              |
|                                                                                                      | r4019                   | The thought of harming myself has occurred to me                                        | 1: Yes, quite often<br>2: Yes, Sometimes<br>3: Hardly ever<br>4: Never<br>-10, -1: Missing                                                                                                               |                                                                                                                                                                                                                                                                                                                                              |
| <b>Maternal anxiety</b>                                                                              |                         |                                                                                         |                                                                                                                                                                                                          |                                                                                                                                                                                                                                                                                                                                              |
| Crown Crisp Experimental Index when child was 11-years ( <i>Br J Med Psychol.</i> 1988;61(3):255–66) | r4000                   | Do you feel upset for no obvious reason?                                                | 1: Very often<br>2: Often<br>3: Not very often<br>4: Never<br>-10, -1: missing                                                                                                                           | Recode r4000 r4005 r4006 (3=0) (4=0) (1=2) (2=2)<br>Recode r4001 r4002 r4004 r4007 (4=0) (3=1) (1=2) (2=2)<br>Recode r4003 (4=0) (1=2) (2=2) (3=2)<br>Generate total score: sum of recoded r4000-r4007 (range: 0-24)<br><br><b>Mode imputation:</b> Replace summed score =. with mode score if at least at least one of r4007-r4007 answered |
|                                                                                                      | r4001                   | Have you felt as though you might faint?                                                |                                                                                                                                                                                                          |                                                                                                                                                                                                                                                                                                                                              |
|                                                                                                      | r4002                   | Do you feel uneasy and restless?                                                        |                                                                                                                                                                                                          |                                                                                                                                                                                                                                                                                                                                              |
|                                                                                                      | r4003                   | Do you sometimes feel panicky?                                                          |                                                                                                                                                                                                          |                                                                                                                                                                                                                                                                                                                                              |
|                                                                                                      | r4004                   | Do you worry a lot?                                                                     |                                                                                                                                                                                                          |                                                                                                                                                                                                                                                                                                                                              |
|                                                                                                      | r4005                   | Do you feel strung-up inside?                                                           |                                                                                                                                                                                                          |                                                                                                                                                                                                                                                                                                                                              |
|                                                                                                      | r4006                   | Do you ever have the feeling you are going to pieces?                                   |                                                                                                                                                                                                          |                                                                                                                                                                                                                                                                                                                                              |
|                                                                                                      | r4007                   | Do you have bad dreams which upset you when you wake up?                                |                                                                                                                                                                                                          |                                                                                                                                                                                                                                                                                                                                              |
| ku847                                                                                                | Wet self during the day |                                                                                         |                                                                                                                                                                                                          |                                                                                                                                                                                                                                                                                                                                              |
| ku848                                                                                                | Wet the bed at night    |                                                                                         |                                                                                                                                                                                                          |                                                                                                                                                                                                                                                                                                                                              |
| <b>Child body mass index</b>                                                                         |                         |                                                                                         |                                                                                                                                                                                                          |                                                                                                                                                                                                                                                                                                                                              |
| Clinical measures of height and weight at 13.5-years                                                 | fg3134                  | Z-score derived using LMS parameters and 1990 British Growth Reference <sup>1,2</sup> . | Continuous score<br>-110, -106, -101: Missing                                                                                                                                                            | Recode z-scores in line with WHO thresholds <sup>3</sup> :                                                                                                                                                                                                                                                                                   |



Supplementary material for: *Prospective relationships between continence problems and common mental health disorders in adolescents from a UK cohort*

| Data collection                                                                                                            | ALSPAC Variable | Question(s)/measure(s)                                     | Responses                                             | Final variable coding                     |
|----------------------------------------------------------------------------------------------------------------------------|-----------------|------------------------------------------------------------|-------------------------------------------------------|-------------------------------------------|
| <b>Earlier emotional and behavioural problems</b>                                                                          |                 |                                                            |                                                       |                                           |
| Adapted from Strengths and Difficulties Questionnaire ( <i>Eur Child Adolesc Psychiatry</i> . 1998;7(3):125–30)            | kw660b          | Derived variable: SDQ total difficulties score (prorated). | Continuous score (range 0-40)<br>-10, -6, -5: Missing | Continuous score<br>Missing = -10, -6, -5 |
| <i>Abbreviations: ALSPAC, Avon Longitudinal Study of Parents and Children; LMS, lambda-mu-sigma; BMI, body mass index.</i> |                 |                                                            |                                                       |                                           |

**Table S4. Amount of missing information for each variable in the substantive models**

| Variable                                       | N missing<br>(/7332) | %     |
|------------------------------------------------|----------------------|-------|
| Daytime wetting                                | 2188                 | 29.84 |
| Bedtime wetting                                | 2187                 | 29.83 |
| Soiling                                        | 2195                 | 29.94 |
| Urgency                                        | 2179                 | 29.72 |
| Frequent urination                             | 2194                 | 29.92 |
| Low voided volume                              | 2210                 | 30.14 |
| Voiding postponement                           | 2195                 | 29.94 |
| Nocturia                                       | 2206                 | 30.09 |
| Common Mental Disorder                         | 3537                 | 48.24 |
| ICD-10 Depression                              | 3537                 | 48.24 |
| High depressive symptoms (SMFQ)                | 3674                 | 50.11 |
| GAD symptoms                                   | 3537                 | 48.24 |
| Physical anxiety score                         | 3711                 | 50.61 |
| Mental anxiety score                           | 3593                 | 49.00 |
| Self-harm act                                  | 3537                 | 48.24 |
| Self-harm thoughts                             | 3537                 | 48.24 |
| Any disordered eating                          | 4636                 | 63.23 |
| Excessive exercise                             | 4689                 | 63.95 |
| Fasting                                        | 4645                 | 63.35 |
| Purging                                        | 4648                 | 63.39 |
| Binge-eating                                   | 4650                 | 63.42 |
| DSM-5 frequency disordered eating              | 4635                 | 63.22 |
| Sex                                            | 0                    | 0.00  |
| Parental social class                          | 844                  | 11.51 |
| Ethnicity                                      | 664                  | 9.06  |
| Maternal education                             | 556                  | 7.58  |
| Home ownership                                 | 1159                 | 15.81 |
| Material hardship                              | 1514                 | 20.65 |
| Family size/Parity                             | 550                  | 7.50  |
| Developmental level                            | 2090                 | 28.51 |
| IQ                                             | 0                    | 0.00  |
| Maternal stressful life events                 | 1459                 | 19.90 |
| Maternal depression                            | 1463                 | 19.95 |
| Maternal anxiety                               | 1468                 | 20.02 |
| BMI                                            | 2055                 | 28.03 |
| Earlier behaviour and emotional problems (SDQ) | 1637                 | 22.33 |

**Table S5. Descriptive information for secondary outcomes (imputed and complete case samples)**

| Variable                | Imputed sample (n=7,332) |      | Mental health sample (n=1528) |  | Disordered eating sample (n=1375) |     |
|-------------------------|--------------------------|------|-------------------------------|--|-----------------------------------|-----|
|                         | % or mean (se)           |      | % or mean (n or SD)           |  | % or mean (n or SD)               |     |
| Physical anxiety        | 25.44                    | 0.11 | 25.40                         |  | 7.51                              |     |
| Mental anxiety          | 21.84                    | 0.08 | 21.68                         |  | 4.81                              |     |
| Self-harm thoughts      | 11.74%                   | 0.56 | 9.42%                         |  | 144                               |     |
| Excessive exercise      | 21.89%                   | 0.81 |                               |  | 22.55%                            | 310 |
| Fasting                 | 11.49%                   | 0.69 |                               |  | 10.76%                            | 148 |
| Purging                 | 6.08%                    | 0.44 |                               |  | 5.53%                             | 76  |
| Binge-eating            | 13.42%                   | 0.72 |                               |  | 11.71%                            | 161 |
| DSM-5 disordered eating | 11.85%                   | 0.64 |                               |  | 9.67%                             | 133 |

DSM-5 - Diagnostic and Statistical Manual of Mental Disorders, Fifth Edition

**Table S6. Sequential adjustments for primary outcomes using imputed data (n=7,332)**

| Exposure             | Outcome                  | Unadjusted        |       | Adjusted 1        |       | Adjusted 2        |       | Adjusted 3        |       | Adjusted 4        |       | Adjusted 5        |       |
|----------------------|--------------------------|-------------------|-------|-------------------|-------|-------------------|-------|-------------------|-------|-------------------|-------|-------------------|-------|
|                      |                          | OR (95% CI)       | p     | OR (95% CI)       | p     | OR (95% CI)       | p     | OR (95% CI)       | p     | OR (95% CI)       | p     | OR (95% CI)       | p     |
| Daytime wetting      | Common mental disorder   | 2.38 (1.59, 3.57) | <.001 | 1.99 (1.32, 3.01) | 0.001 | 1.88 (1.23, 2.86) | 0.003 | 1.89 (1.24, 2.89) | 0.003 | 1.79 (1.17, 2.74) | 0.007 | 1.59 (1.03, 2.47) | 0.036 |
| Bedwetting           | Common mental disorder   | 1.77 (1.06, 2.96) | 0.029 | 1.90 (1.12, 3.22) | 0.017 | 1.67 (0.97, 2.89) | 0.065 | 1.68 (0.97, 2.89) | 0.063 | 1.66 (0.96, 2.88) | 0.071 | 1.39 (0.78, 2.47) | 0.259 |
| Soiling              | Common mental disorder   | 1.56 (1.08, 2.26) | 0.019 | 1.34 (0.92, 1.97) | 0.128 | 1.32 (0.90, 1.95) | 0.157 | 1.33 (0.90, 1.96) | 0.151 | 1.30 (0.88, 1.92) | 0.192 | 1.25 (0.84, 1.86) | 0.278 |
| Urgency              | Common mental disorder   | 2.07 (1.40, 3.06) | <.001 | 1.99 (1.33, 2.98) | 0.001 | 1.74 (1.15, 2.64) | 0.009 | 1.75 (1.16, 2.66) | 0.008 | 1.67 (1.10, 2.54) | 0.017 | 1.54 (1.00, 2.36) | 0.05  |
| Frequent urination   | Common mental disorder   | 1.83 (1.07, 3.10) | 0.027 | 1.74 (1.01, 3.00) | 0.047 | 1.55 (0.89, 2.71) | 0.12  | 1.56 (0.89, 2.72) | 0.116 | 1.53 (0.87, 2.67) | 0.139 | 1.41 (0.80, 2.50) | 0.231 |
| Low voided volume    | Common mental disorder   | 1.75 (1.16, 2.65) | 0.008 | 1.64 (1.08, 2.49) | 0.021 | 1.56 (1.02, 2.39) | 0.039 | 1.57 (1.02, 2.40) | 0.039 | 1.55 (1.01, 2.38) | 0.047 | 1.45 (0.94, 2.26) | 0.095 |
| Voiding postponement | Common mental disorder   | 2.06 (1.63, 2.60) | <.001 | 2.03 (1.60, 2.58) | <.001 | 1.95 (1.52, 2.49) | <.001 | 1.95 (1.52, 2.49) | <.001 | 1.93 (1.51, 2.46) | <.001 | 1.88 (1.46, 2.41) | <.001 |
| Nocturia             | Common mental disorder   | 1.44 (1.07, 1.94) | 0.017 | 1.41 (1.04, 1.91) | 0.028 | 1.30 (0.95, 1.77) | 0.103 | 1.30 (0.95, 1.78) | 0.101 | 1.28 (0.93, 1.76) | 0.124 | 1.19 (0.86, 1.64) | 0.303 |
| Exposure             | Outcome                  | OR (95% CI)       | p     | OR (95% CI)       | p     | OR (95% CI)       | p     | OR (95% CI)       | p     | OR (95% CI)       | p     | OR (95% CI)       | p     |
| Daytime wetting      | ICD-10 depression        | 2.48 (1.52, 4.04) | <.001 | 2.08 (1.27, 3.40) | 0.004 | 1.95 (1.18, 3.24) | 0.01  | 2.00 (1.20, 3.32) | 0.008 | 1.96 (1.18, 3.24) | 0.009 | 1.77 (1.05, 2.98) | 0.032 |
| Bedwetting           | ICD-10 depression        | 0.61 (0.22, 1.70) | 0.34  | 0.64 (0.23, 1.79) | 0.389 | 0.52 (0.18, 1.50) | 0.224 | 0.52 (0.18, 1.52) | 0.232 | 0.52 (0.18, 1.52) | 0.232 | 0.44 (0.15, 1.31) | 0.14  |
| Soiling              | ICD-10 depression        | 1.18 (0.67, 2.05) | 0.565 | 1.01 (0.57, 1.78) | 0.968 | 1.00 (0.56, 1.79) | 0.991 | 1.03 (0.58, 1.85) | 0.915 | 1.03 (0.57, 1.84) | 0.933 | 0.99 (0.55, 1.78) | 0.964 |
| Urgency              | ICD-10 depression        | 2.43 (1.56, 3.78) | <.001 | 2.33 (1.49, 3.65) | <.001 | 2.00 (1.25, 3.19) | 0.004 | 2.08 (1.30, 3.34) | 0.002 | 2.05 (1.28, 3.30) | 0.003 | 1.94 (1.19, 3.14) | 0.008 |
| Frequent urination   | ICD-10 depression        | 1.33 (0.67, 2.67) | 0.413 | 1.26 (0.63, 2.54) | 0.516 | 1.08 (0.53, 2.22) | 0.822 | 1.12 (0.55, 2.30) | 0.752 | 1.11 (0.54, 2.28) | 0.774 | 1.04 (0.50, 2.14) | 0.919 |
| Low voided volume    | ICD-10 depression        | 1.82 (1.10, 2.99) | 0.019 | 1.69 (1.02, 2.81) | 0.041 | 1.60 (0.95, 2.67) | 0.075 | 1.62 (0.97, 2.71) | 0.064 | 1.62 (0.97, 2.70) | 0.067 | 1.53 (0.91, 2.57) | 0.107 |
| Voiding postponement | ICD-10 depression        | 1.74 (1.29, 2.35) | <.001 | 1.70 (1.25, 2.31) | 0.001 | 1.61 (1.18, 2.20) | 0.003 | 1.62 (1.18, 2.22) | 0.003 | 1.61 (1.18, 2.21) | 0.003 | 1.58 (1.15, 2.16) | 0.005 |
| Nocturia             | ICD-10 depression        | 1.32 (0.89, 1.96) | 0.163 | 1.29 (0.86, 1.92) | 0.212 | 1.16 (0.77, 1.75) | 0.472 | 1.19 (0.79, 1.80) | 0.398 | 1.19 (0.79, 1.79) | 0.414 | 1.11 (0.73, 1.69) | 0.628 |
| Exposure             | Outcome                  | OR (95% CI)       | p     | OR (95% CI)       | p     | OR (95% CI)       | p     | OR (95% CI)       | p     | OR (95% CI)       | p     | OR (95% CI)       | p     |
| Daytime wetting      | High depressive symptoms | 2.26 (1.54, 3.32) | <.001 | 2.03 (1.38, 2.98) | <.001 | 1.95 (1.32, 2.87) | 0.001 | 1.91 (1.29, 2.84) | 0.001 | 1.84 (1.24, 2.74) | 0.002 | 1.70 (1.13, 2.56) | 0.011 |
| Bedwetting           | High depressive symptoms | 1.42 (0.88, 2.32) | 0.154 | 1.48 (0.90, 2.41) | 0.12  | 1.29 (0.77, 2.15) | 0.324 | 1.26 (0.75, 2.11) | 0.381 | 1.25 (0.74, 2.11) | 0.403 | 1.10 (0.63, 1.89) | 0.741 |
| Soiling              | High depressive symptoms | 1.83 (1.30, 2.59) | 0.001 | 1.68 (1.19, 2.38) | 0.004 | 1.70 (1.19, 2.43) | 0.004 | 1.59 (1.11, 2.29) | 0.012 | 1.56 (1.08, 2.25) | 0.018 | 1.52 (1.05, 2.20) | 0.029 |
| Urgency              | High depressive symptoms | 1.27 (0.86, 1.90) | 0.231 | 1.23 (0.83, 1.85) | 0.302 | 1.05 (0.69, 1.61) | 0.821 | 0.97 (0.63, 1.50) | 0.905 | 0.94 (0.61, 1.45) | 0.771 | 0.87 (0.56, 1.35) | 0.535 |
| Frequent urination   | High depressive symptoms | 1.35 (0.85, 2.13) | 0.202 | 1.30 (0.82, 2.07) | 0.262 | 1.16 (0.72, 1.87) | 0.543 | 1.09 (0.67, 1.76) | 0.727 | 1.06 (0.66, 1.73) | 0.799 | 1.01 (0.62, 1.64) | 0.981 |
| Low voided volume    | High depressive symptoms | 2.21 (1.55, 3.14) | <.001 | 2.13 (1.49, 3.03) | <.001 | 2.02 (1.41, 2.91) | <.001 | 1.98 (1.37, 2.86) | <.001 | 1.95 (1.34, 2.82) | <.001 | 1.87 (1.28, 2.73) | 0.001 |
| Voiding postponement | High depressive symptoms | 1.68 (1.35, 2.10) | <.001 | 1.66 (1.33, 2.07) | <.001 | 1.59 (1.26, 1.99) | <.001 | 1.58 (1.25, 1.99) | <.001 | 1.56 (1.24, 1.97) | <.001 | 1.53 (1.21, 1.93) | <.001 |
| Nocturia             | High depressive symptoms | 1.55 (1.19, 2.03) | 0.001 | 1.53 (1.17, 2.01) | 0.002 | 1.41 (1.07, 1.86) | 0.015 | 1.34 (1.02, 1.78) | 0.038 | 1.33 (1.00, 1.76) | 0.047 | 1.26 (0.95, 1.68) | 0.109 |
| Exposure             | Outcome                  | OR (95% CI)       | p     | OR (95% CI)       | p     | OR (95% CI)       | p     | OR (95% CI)       | p     | OR (95% CI)       | p     | OR (95% CI)       | p     |
| Daytime wetting      | GAD symptoms             | 4.11 (2.51, 6.74) | <.001 | 3.57 (2.17, 5.87) | <.001 | 3.30 (1.98, 5.49) | <.001 | 3.30 (1.97, 5.51) | <.001 | 3.18 (1.89, 5.33) | <.001 | 3.01 (1.78, 5.09) | <.001 |
| Bedwetting           | GAD symptoms             | 2.50 (1.22, 5.09) | 0.012 | 2.64 (1.29, 5.40) | 0.008 | 2.39 (1.16, 4.92) | 0.019 | 2.36 (1.15, 4.85) | 0.02  | 2.32 (1.12, 4.78) | 0.023 | 2.16 (1.03, 4.52) | 0.042 |
| Soiling              | GAD symptoms             | 1.69 (0.96, 2.96) | 0.067 | 1.49 (0.84, 2.62) | 0.168 | 1.44 (0.82, 2.53) | 0.203 | 1.39 (0.79, 2.44) | 0.253 | 1.35 (0.76, 2.39) | 0.304 | 1.32 (0.74, 2.35) | 0.348 |
| Urgency              | GAD symptoms             | 2.64 (1.54, 4.52) | <.001 | 2.54 (1.47, 4.39) | 0.001 | 2.31 (1.33, 4.03) | 0.003 | 2.24 (1.29, 3.90) | 0.005 | 2.16 (1.23, 3.79) | 0.008 | 2.09 (1.19, 3.67) | 0.011 |
| Frequent urination   | GAD symptoms             | 2.80 (1.48, 5.30) | 0.002 | 2.69 (1.42, 5.10) | 0.003 | 2.56 (1.34, 4.88) | 0.005 | 2.48 (1.30, 4.74) | 0.006 | 2.44 (1.27, 4.69) | 0.008 | 2.37 (1.23, 4.57) | 0.01  |

Supplementary material for: *Prospective relationships between continence problems and common mental health disorders in adolescents from a UK cohort*

|                      |                       |                    |          |                    |          |                    |          |                    |          |                    |          |                    |          |
|----------------------|-----------------------|--------------------|----------|--------------------|----------|--------------------|----------|--------------------|----------|--------------------|----------|--------------------|----------|
| Low voided volume    | GAD symptoms          | 1.22 (0.62, 2.42)  | 0.564    | 1.14 (0.57, 2.28)  | 0.701    | 1.11 (0.56, 2.20)  | 0.767    | 1.09 (0.55, 2.18)  | 0.805    | 1.07 (0.53, 2.16)  | 0.841    | 1.03 (0.51, 2.07)  | 0.935    |
| Voiding postponement | GAD symptoms          | 1.74 (1.22, 2.50)  | 0.003    | 1.70 (1.19, 2.45)  | 0.004    | 1.64 (1.14, 2.36)  | 0.008    | 1.63 (1.13, 2.36)  | 0.009    | 1.61 (1.12, 2.33)  | 0.01     | 1.59 (1.10, 2.30)  | 0.013    |
| Nocturia             | GAD symptoms          | 2.02 (1.31, 3.09)  | 0.001    | 1.98 (1.28, 3.04)  | 0.002    | 1.87 (1.21, 2.90)  | 0.005    | 1.83 (1.18, 2.82)  | 0.007    | 1.80 (1.17, 2.78)  | 0.008    | 1.73 (1.12, 2.68)  | 0.014    |
| <b>Exposure</b>      | <b>Outcome</b>        | <b>OR (95% CI)</b> | <b>p</b> | <b>OR (95% CI)</b> | <b>p</b> | <b>OR (95% CI)</b> | <b>p</b> | <b>OR (95% CI)</b> | <b>p</b> | <b>OR (95% CI)</b> | <b>p</b> | <b>OR (95% CI)</b> | <b>p</b> |
| Daytime wetting      | Self-harm act         | 1.66 (0.94, 2.95)  | 0.082    | 1.37 (0.77, 2.46)  | 0.282    | 1.26 (0.69, 2.28)  | 0.449    | 1.23 (0.68, 2.24)  | 0.498    | 1.16 (0.63, 2.12)  | 0.637    | 1.07 (0.58, 1.98)  | 0.826    |
| Bedwetting           | Self-harm act         | 1.98 (1.11, 3.54)  | 0.021    | 2.12 (1.17, 3.83)  | 0.013    | 1.94 (1.06, 3.53)  | 0.031    | 1.92 (1.05, 3.50)  | 0.034    | 1.87 (1.02, 3.44)  | 0.044    | 1.71 (0.93, 3.16)  | 0.086    |
| Soiling              | Self-harm act         | 1.36 (0.83, 2.22)  | 0.216    | 1.17 (0.71, 1.92)  | 0.541    | 1.14 (0.69, 1.88)  | 0.619    | 1.11 (0.67, 1.83)  | 0.691    | 1.07 (0.64, 1.77)  | 0.802    | 1.04 (0.62, 1.73)  | 0.885    |
| Urgency              | Self-harm act         | 0.70 (0.34, 1.45)  | 0.337    | 0.66 (0.31, 1.38)  | 0.265    | 0.57 (0.28, 1.20)  | 0.138    | 0.56 (0.27, 1.17)  | 0.121    | 0.52 (0.25, 1.10)  | 0.089    | 0.49 (0.23, 1.05)  | 0.065    |
| Frequent urination   | Self-harm act         | 1.63 (0.89, 2.98)  | 0.112    | 1.54 (0.83, 2.85)  | 0.167    | 1.43 (0.77, 2.67)  | 0.255    | 1.40 (0.75, 2.62)  | 0.284    | 1.37 (0.73, 2.58)  | 0.33     | 1.32 (0.70, 2.50)  | 0.396    |
| Low voided volume    | Self-harm act         | 0.88 (0.50, 1.55)  | 0.645    | 0.80 (0.45, 1.43)  | 0.456    | 0.77 (0.43, 1.37)  | 0.377    | 0.76 (0.42, 1.35)  | 0.346    | 0.74 (0.42, 1.33)  | 0.313    | 0.71 (0.39, 1.27)  | 0.245    |
| Voiding postponement | Self-harm act         | 1.17 (0.85, 1.63)  | 0.335    | 1.14 (0.82, 1.59)  | 0.437    | 1.09 (0.78, 1.53)  | 0.604    | 1.10 (0.78, 1.54)  | 0.593    | 1.08 (0.77, 1.52)  | 0.665    | 1.06 (0.75, 1.49)  | 0.752    |
| Nocturia             | Self-harm act         | 1.35 (0.92, 1.97)  | 0.126    | 1.31 (0.89, 1.93)  | 0.173    | 1.24 (0.84, 1.83)  | 0.288    | 1.22 (0.82, 1.80)  | 0.319    | 1.20 (0.81, 1.77)  | 0.373    | 1.14 (0.77, 1.70)  | 0.513    |
| <b>Exposure</b>      | <b>Outcome</b>        | <b>OR (95% CI)</b> | <b>p</b> | <b>OR (95% CI)</b> | <b>p</b> | <b>OR (95% CI)</b> | <b>p</b> | <b>OR (95% CI)</b> | <b>p</b> | <b>OR (95% CI)</b> | <b>p</b> | <b>OR (95% CI)</b> | <b>p</b> |
| Daytime wetting      | Any disordered eating | 2.06 (1.41, 3.01)  | <.001    | 1.58 (1.06, 2.35)  | 0.024    | 1.56 (1.05, 2.31)  | 0.029    | 1.61 (1.08, 2.41)  | 0.019    | 1.58 (1.06, 2.37)  | 0.026    | 1.48 (0.98, 2.25)  | 0.064    |
| Bedwetting           | Any disordered eating | 1.51 (0.98, 2.30)  | 0.059    | 1.71 (1.09, 2.69)  | 0.021    | 1.72 (1.09, 2.72)  | 0.02     | 1.74 (1.10, 2.76)  | 0.017    | 1.72 (1.09, 2.72)  | 0.02     | 1.61 (1.00, 2.59)  | 0.052    |
| Soiling              | Any disordered eating | 1.68 (1.21, 2.33)  | 0.002    | 1.35 (0.96, 1.92)  | 0.088    | 1.34 (0.94, 1.91)  | 0.101    | 1.38 (0.97, 1.98)  | 0.073    | 1.36 (0.95, 1.94)  | 0.091    | 1.33 (0.92, 1.91)  | 0.131    |
| Urgency              | Any disordered eating | 1.33 (0.92, 1.94)  | 0.132    | 1.25 (0.83, 1.87)  | 0.278    | 1.24 (0.82, 1.88)  | 0.303    | 1.27 (0.84, 1.94)  | 0.259    | 1.25 (0.82, 1.90)  | 0.296    | 1.21 (0.79, 1.86)  | 0.378    |
| Frequent urination   | Any disordered eating | 1.36 (0.90, 2.07)  | 0.144    | 1.27 (0.81, 2.00)  | 0.304    | 1.27 (0.80, 2.03)  | 0.305    | 1.30 (0.82, 2.08)  | 0.264    | 1.29 (0.81, 2.07)  | 0.282    | 1.24 (0.77, 2.00)  | 0.368    |
| Low voided volume    | Any disordered eating | 1.66 (1.11, 2.48)  | 0.014    | 1.52 (0.98, 2.36)  | 0.061    | 1.53 (0.98, 2.38)  | 0.061    | 1.56 (1.00, 2.44)  | 0.05     | 1.56 (1.00, 2.45)  | 0.05     | 1.52 (0.97, 2.40)  | 0.07     |
| Voiding postponement | Any disordered eating | 1.41 (1.13, 1.75)  | 0.003    | 1.38 (1.09, 1.74)  | 0.007    | 1.38 (1.09, 1.74)  | 0.007    | 1.37 (1.09, 1.73)  | 0.008    | 1.36 (1.08, 1.72)  | 0.01     | 1.36 (1.07, 1.74)  | 0.013    |
| Nocturia             | Any disordered eating | 1.76 (1.34, 2.31)  | <.001    | 1.76 (1.32, 2.36)  | <.001    | 1.78 (1.32, 2.38)  | <.001    | 1.81 (1.34, 2.43)  | <.001    | 1.80 (1.33, 2.42)  | <.001    | 1.72 (1.27, 2.34)  | 0.001    |

GAD – Generalised Anxiety Disorder; ICD-10 - International Classification of Diseases, Tenth Revision.

Adjusted 1 confounders: sex. Adjusted 2 confounders: sex and socioeconomic indicators (parental occupational social class, maternal educational attainment, family size, ethnicity, home ownership status, material hardship). Adjusted 3 confounders: sex, socioeconomic indicators, child IQ and developmental level. Adjusted 4 confounders: sex, socioeconomic indicators, child IQ, developmental level, maternal stressful life events, maternal depression and maternal anxiety. Adjusted 5 confounders: sex, socioeconomic indicators, child IQ, developmental level, maternal stressful life events, maternal depression, maternal anxiety, child Body Mass Index and earlier emotional/behaviour problems (fully adjusted model).

**Table S7. Sequential adjustments for primary outcomes using complete case data (mental health outcomes n=1,528; disordered eating outcome n=1,375)**

| Exposure             | Outcome                  | Unadjusted        |       | Adjusted 1        |       | Adjusted 2        |       | Adjusted 3        |       | Adjusted 4        |       | Adjusted 5          |       |
|----------------------|--------------------------|-------------------|-------|-------------------|-------|-------------------|-------|-------------------|-------|-------------------|-------|---------------------|-------|
|                      |                          | OR (95% CI)       | p     | OR (95% CI)       | p     | OR (95% CI)       | p     | OR (95% CI)       | p     | OR (95% CI)       | p     | OR (95% CI)         | p     |
| Daytime wetting      | Common mental disorder   | 2.44 (1.30, 4.56) | 0.005 | 2.08 (1.10, 3.92) | 0.024 | 2.09 (1.10, 3.95) | 0.024 | 2.07 (1.09, 3.93) | 0.025 | 2.02 (1.06, 3.84) | 0.032 | 1.95 (1.02, 3.74)   | 0.044 |
| Bedwetting           | Common mental disorder   | 1.01 (0.39, 2.60) | 0.991 | 1.13 (0.43, 2.97) | 0.800 | 1.07 (0.41, 2.84) | 0.884 | 1.07 (0.40, 2.83) | 0.891 | 1.09 (0.41, 2.90) | 0.865 | 0.89 (0.33, 2.41)   | 0.820 |
| Soiling              | Common mental disorder   | 1.63 (0.87, 3.04) | 0.125 | 1.38 (0.74, 2.60) | 0.314 | 1.34 (0.71, 2.53) | 0.371 | 1.32 (0.70, 2.50) | 0.393 | 1.35 (0.71, 2.56) | 0.361 | 1.31 (0.69, 2.50)   | 0.415 |
| Urgency              | Common mental disorder   | 2.23 (1.22, 4.07) | 0.009 | 2.15 (1.17, 3.97) | 0.014 | 2.09 (1.13, 3.87) | 0.019 | 2.08 (1.13, 3.86) | 0.019 | 2.04 (1.10, 3.79) | 0.024 | 2.00 (1.07, 3.73)   | 0.030 |
| Frequent urination   | Common mental disorder   | 1.62 (0.70, 3.73) | 0.260 | 1.54 (0.66, 3.61) | 0.315 | 1.52 (0.64, 3.57) | 0.340 | 1.50 (0.64, 3.54) | 0.351 | 1.51 (0.64, 3.57) | 0.347 | 1.44 (0.60, 3.43)   | 0.412 |
| Low voided volume    | Common mental disorder   | 1.21 (0.61, 2.41) | 0.588 | 1.10 (0.55, 2.20) | 0.798 | 1.11 (0.55, 2.23) | 0.776 | 1.10 (0.55, 2.22) | 0.785 | 1.07 (0.53, 2.17) | 0.847 | 0.98 (0.48, 1.99)   | 0.945 |
| Voiding postponement | Common mental disorder   | 1.60 (1.05, 2.42) | 0.028 | 1.59 (1.04, 2.43) | 0.031 | 1.56 (1.02, 2.39) | 0.039 | 1.57 (1.03, 2.40) | 0.037 | 1.48 (0.96, 2.27) | 0.073 | 1.45 (0.94, 2.23)   | 0.092 |
| Nocturia             | Common mental disorder   | 1.29 (0.79, 2.11) | 0.309 | 1.30 (0.79, 2.14) | 0.299 | 1.30 (0.79, 2.14) | 0.308 | 1.29 (0.78, 2.13) | 0.322 | 1.28 (0.77, 2.11) | 0.344 | 1.26 (0.75, 2.09)   | 0.381 |
| Exposure             | Outcome                  | OR (95% CI)       | p     | OR (95% CI)       | p     | OR (95% CI)       | p     | OR (95% CI)       | p     | OR (95% CI)       | p     | OR (95% CI)         | p     |
| Daytime wetting      | ICD-10 depression        | 3.22 (1.58, 6.60) | 0.001 | 2.85 (1.38, 5.87) | 0.004 | 2.98 (1.44, 6.16) | 0.003 | 3.03 (1.46, 6.28) | 0.003 | 3.04 (1.46, 6.33) | 0.003 | 2.94 (1.40, 6.16)†  | 0.004 |
| Bedwetting           | ICD-10 depression        | 0.35 (0.05, 2.58) | 0.303 | 0.38 (0.05, 2.81) | 0.344 | 0.36 (0.05, 2.64) | 0.313 | 0.36 (0.05, 2.66) | 0.315 | 0.36 (0.05, 2.71) | 0.323 | 0.30 (0.04, 2.27) † | 0.245 |
| Soiling              | ICD-10 depression        | 1.57 (0.70, 3.52) | 0.275 | 1.38 (0.61, 3.11) | 0.438 | 1.36 (0.60, 3.08) | 0.468 | 1.39 (0.61, 3.16) | 0.437 | 1.38 (0.61, 3.15) | 0.442 | 1.35 (0.59, 3.10)†  | 0.477 |
| Urgency              | ICD-10 depression        | 3.09 (1.56, 6.11) | 0.001 | 2.99 (1.50, 5.95) | 0.002 | 2.89 (1.44, 5.80) | 0.003 | 2.93 (1.46, 5.87) | 0.002 | 2.95 (1.47, 5.93) | 0.002 | 2.90 (1.43, 5.85)†  | 0.003 |
| Frequent urination   | ICD-10 depression        | 1.20 (0.36, 3.98) | 0.764 | 1.15 (0.35, 3.83) | 0.818 | 1.15 (0.34, 3.85) | 0.824 | 1.17 (0.35, 3.92) | 0.802 | 1.18 (0.35, 3.95) | 0.791 | 1.13 (0.33, 3.81)†  | 0.850 |
| Low voided volume    | ICD-10 depression        | 1.91 (0.89, 4.10) | 0.099 | 1.77 (0.82, 3.83) | 0.145 | 1.79 (0.82, 3.89) | 0.141 | 1.81 (0.83, 3.93) | 0.136 | 1.79 (0.82, 3.90) | 0.142 | 1.63 (0.74, 3.58)†  | 0.221 |
| Voiding postponement | ICD-10 depression        | 1.40 (0.80, 2.44) | 0.237 | 1.39 (0.79, 2.43) | 0.251 | 1.36 (0.78, 2.39) | 0.282 | 1.36 (0.77, 2.39) | 0.287 | 1.35 (0.77, 2.38) | 0.298 | 1.30 (0.74, 2.30)†  | 0.362 |
| Nocturia             | ICD-10 depression        | 1.51 (0.82, 2.77) | 0.187 | 1.52 (0.82, 2.80) | 0.184 | 1.52 (0.82, 2.82) | 0.180 | 1.54 (0.83, 2.85) | 0.169 | 1.55 (0.83, 2.86) | 0.167 | 1.52 (0.82, 2.83)†  | 0.185 |
| Exposure             | Outcome                  | OR (95% CI)       | p     | OR (95% CI)       | p     | OR (95% CI)       | p     | OR (95% CI)       | p     | OR (95% CI)       | p     | OR (95% CI)         | p     |
| Daytime wetting      | High depressive symptoms | 1.88 (1.03, 3.41) | 0.038 | 1.70 (0.93, 3.11) | 0.083 | 1.71 (0.93, 3.14) | 0.084 | 1.65 (0.89, 3.03) | 0.110 | 1.61 (0.87, 2.97) | 0.128 | 1.58 (0.86, 2.93)   | 0.143 |
| Bedwetting           | High depressive symptoms | 0.97 (0.43, 2.23) | 0.951 | 1.04 (0.45, 2.39) | 0.926 | 0.96 (0.41, 2.24) | 0.926 | 0.93 (0.40, 2.19) | 0.871 | 0.92 (0.39, 2.17) | 0.853 | 0.83 (0.35, 1.99)   | 0.682 |
| Soiling              | High depressive symptoms | 2.18 (1.29, 3.68) | 0.004 | 1.99 (1.17, 3.37) | 0.011 | 1.97 (1.15, 3.37) | 0.014 | 1.81 (1.05, 3.12) | 0.031 | 1.84 (1.07, 3.17) | 0.027 | 1.83 (1.06, 3.16)   | 0.030 |
| Urgency              | High depressive symptoms | 1.05 (0.55, 2.00) | 0.880 | 1.02 (0.53, 1.94) | 0.957 | 0.95 (0.49, 1.82) | 0.868 | 0.92 (0.48, 1.79) | 0.815 | 0.88 (0.45, 1.71) | 0.707 | 0.88 (0.45, 1.70)   | 0.695 |
| Frequent urination   | High depressive symptoms | 1.24 (0.56, 2.73) | 0.600 | 1.20 (0.54, 2.66) | 0.656 | 1.17 (0.52, 2.63) | 0.712 | 1.11 (0.49, 2.53) | 0.801 | 1.09 (0.48, 2.49) | 0.842 | 1.07 (0.46, 2.45)   | 0.880 |
| Low voided volume    | High depressive symptoms | 1.82 (1.05, 3.15) | 0.032 | 1.73 (0.99, 3.00) | 0.052 | 1.76 (1.01, 3.08) | 0.046 | 1.72 (0.98, 3.02) | 0.059 | 1.68 (0.96, 2.95) | 0.072 | 1.60 (0.91, 2.83)   | 0.103 |
| Voiding postponement | High depressive symptoms | 1.55 (1.07, 2.24) | 0.020 | 1.54 (1.07, 2.24) | 0.022 | 1.51 (1.04, 2.21) | 0.031 | 1.55 (1.06, 2.26) | 0.023 | 1.49 (1.02, 2.19) | 0.040 | 1.47 (1.00, 2.16)   | 0.047 |
| Nocturia             | High depressive symptoms | 1.37 (0.90, 2.09) | 0.146 | 1.38 (0.90, 2.11) | 0.142 | 1.37 (0.89, 2.11) | 0.152 | 1.32 (0.85, 2.03) | 0.217 | 1.32 (0.85, 2.05) | 0.213 | 1.31 (0.85, 2.04)   | 0.222 |
| Exposure             | Outcome                  | OR (95% CI)       | p     | OR (95% CI)       | p     | OR (95% CI)       | p     | OR (95% CI)       | p     | OR (95% CI)       | p     | OR (95% CI)         | p     |
| Daytime wetting      | GAD symptoms             | 3.41 (1.55, 7.50) | 0.002 | 2.96 (1.34, 6.54) | 0.007 | 3.02 (1.36, 6.71) | 0.007 | 2.98 (1.34, 6.64) | 0.008 | 2.87 (1.28, 6.42) | 0.010 | 2.80 (1.24, 6.32)†  | 0.013 |
| Bedwetting           | GAD symptoms             | 2.19 (0.76, 6.31) | 0.149 | 2.46 (0.84, 7.18) | 0.100 | 2.34 (0.79, 6.88) | 0.123 | 2.31 (0.79, 6.82) | 0.128 | 2.29 (0.78, 6.78) | 0.134 | 2.04 (0.68, 6.11)†  | 0.203 |
| Soiling              | GAD symptoms             | 1.48 (0.58, 3.80) | 0.411 | 1.28 (0.50, 3.29) | 0.612 | 1.25 (0.48, 3.24) | 0.648 | 1.22 (0.47, 3.16) | 0.689 | 1.25 (0.48, 3.24) | 0.648 | 1.25 (0.48, 3.26)†  | 0.649 |

Supplementary material for: *Prospective relationships between continence problems and common mental health disorders in adolescents from a UK cohort*

|                      |                       | Unadjusted        |       | Adjusted 1        |       | Adjusted 2        |       | Adjusted 3        |       | Adjusted 4        |       | Adjusted 5         |       |
|----------------------|-----------------------|-------------------|-------|-------------------|-------|-------------------|-------|-------------------|-------|-------------------|-------|--------------------|-------|
| Urgency              | GAD symptoms          | 2.45 (1.08, 5.58) | 0.032 | 2.36 (1.03, 5.39) | 0.042 | 2.32 (1.00, 5.34) | 0.049 | 2.30 (1.00, 5.30) | 0.051 | 2.21 (0.95, 5.11) | 0.065 | 2.20 (0.95, 5.13)† | 0.066 |
| Frequent urination   | GAD symptoms          | 3.81 (1.54, 9.44) | 0.004 | 3.69 (1.48, 9.19) | 0.005 | 3.66 (1.45, 9.25) | 0.006 | 3.61 (1.43, 9.15) | 0.007 | 3.60 (1.41, 9.14) | 0.007 | 3.44 (1.34, 8.81)† | 0.010 |
| Low voided volume    | GAD symptoms          | 1.53 (0.60, 3.93) | 0.373 | 1.40 (0.55, 3.62) | 0.481 | 1.42 (0.55, 3.66) | 0.473 | 1.40 (0.54, 3.62) | 0.490 | 1.37 (0.53, 3.56) | 0.518 | 1.27 (0.49, 3.31)† | 0.629 |
| Voiding postponement | GAD symptoms          | 1.12 (0.57, 2.22) | 0.741 | 1.11 (0.56, 2.20) | 0.769 | 1.08 (0.54, 2.16) | 0.823 | 1.09 (0.55, 2.18) | 0.802 | 1.03 (0.51, 2.06) | 0.934 | 1.00 (0.50, 2.00)† | 0.991 |
| Nocturia             | GAD symptoms          | 1.56 (0.78, 3.10) | 0.206 | 1.57 (0.79, 3.13) | 0.202 | 1.57 (0.78, 3.14) | 0.205 | 1.55 (0.77, 3.10) | 0.221 | 1.52 (0.76, 3.07) | 0.238 | 1.51 (0.75, 3.06)† | 0.246 |
| Exposure             | Outcome               | OR (95% CI)       | p     | OR (95% CI)       | p     | OR (95% CI)       | p     | OR (95% CI)       | p     | OR (95% CI)       | p     | OR (95% CI)        | p     |
| Daytime wetting      | Self-harm act         | 1.42 (0.60, 3.38) | 0.430 | 1.23 (0.51, 2.94) | 0.645 | 1.29 (0.54, 3.10) | 0.572 | 1.28 (0.53, 3.09) | 0.583 | 1.21 (0.50, 2.92) | 0.678 | 1.22 (0.50, 2.98)† | 0.657 |
| Bedwetting           | Self-harm act         | 2.59 (1.12, 5.99) | 0.026 | 2.91 (1.24, 6.81) | 0.014 | 2.99 (1.27, 7.08) | 0.013 | 2.99 (1.26, 7.07) | 0.013 | 2.98 (1.25, 7.12) | 0.014 | 2.77 (1.15, 6.67)† | 0.023 |
| Soiling              | Self-harm act         | 1.53 (0.72, 3.28) | 0.272 | 1.34 (0.62, 2.88) | 0.459 | 1.27 (0.59, 2.77) | 0.541 | 1.26 (0.58, 2.75) | 0.565 | 1.31 (0.60, 2.86) | 0.494 | 1.32 (0.61, 2.90)† | 0.482 |
| Urgency              | Self-harm act         | 0.56 (0.17, 1.81) | 0.334 | 0.53 (0.16, 1.73) | 0.295 | 0.51 (0.16, 1.67) | 0.266 | 0.51 (0.16, 1.67) | 0.266 | 0.48 (0.15, 1.57) | 0.224 | 0.49 (0.15, 1.61)† | 0.238 |
| Frequent urination   | Self-harm act         | 1.01 (0.31, 3.33) | 0.989 | 0.96 (0.29, 3.20) | 0.950 | 0.92 (0.27, 3.09) | 0.890 | 0.92 (0.27, 3.09) | 0.888 | 0.89 (0.26, 3.04) | 0.855 | 0.88 (0.26, 3.01)† | 0.833 |
| Low voided volume    | Self-harm act         | 0.92 (0.36, 2.33) | 0.857 | 0.84 (0.33, 2.15) | 0.720 | 0.84 (0.33, 2.15) | 0.719 | 0.83 (0.32, 2.13) | 0.699 | 0.81 (0.32, 2.09) | 0.666 | 0.76 (0.30, 1.97)† | 0.576 |
| Voiding postponement | Self-harm act         | 1.15 (0.66, 1.99) | 0.624 | 1.13 (0.65, 1.97) | 0.654 | 1.09 (0.62, 1.90) | 0.769 | 1.10 (0.63, 1.92) | 0.747 | 1.01 (0.58, 1.78) | 0.963 | 0.99 (0.56, 1.74)† | 0.970 |
| Nocturia             | Self-harm act         | 1.24 (0.68, 2.27) | 0.481 | 1.25 (0.68, 2.29) | 0.474 | 1.23 (0.67, 2.27) | 0.504 | 1.22 (0.66, 2.26) | 0.517 | 1.19 (0.64, 2.20) | 0.588 | 1.20 (0.65, 2.23)† | 0.560 |
| Exposure             | Outcome               | OR (95% CI)       | p     | OR (95% CI)       | p     | OR (95% CI)       | p     | OR (95% CI)       | p     | OR (95% CI)       | p     | OR (95% CI)        | p     |
| Daytime wetting      | Any disordered eating | 2.07 (1.15, 3.73) | 0.016 | 1.67 (0.91, 3.08) | 0.100 | 1.72 (0.93, 3.20) | 0.085 | 1.78 (0.96, 3.32) | 0.068 | 1.75 (0.94, 3.27) | 0.077 | 1.58 (0.84, 2.99)  | 0.160 |
| Bedwetting           | Any disordered eating | 1.45 (0.74, 2.85) | 0.275 | 1.66 (0.81, 3.39) | 0.163 | 1.64 (0.80, 3.37) | 0.177 | 1.68 (0.82, 3.44) | 0.158 | 1.67 (0.81, 3.44) | 0.163 | 1.41 (0.67, 2.98)  | 0.365 |
| Soiling              | Any disordered eating | 1.35 (0.82, 2.22) | 0.241 | 1.17 (0.69, 1.97) | 0.559 | 1.15 (0.68, 1.94) | 0.611 | 1.19 (0.70, 2.02) | 0.526 | 1.18 (0.70, 2.01) | 0.534 | 1.12 (0.66, 1.92)  | 0.674 |
| Urgency              | Any disordered eating | 1.24 (0.75, 2.07) | 0.405 | 1.18 (0.69, 2.02) | 0.540 | 1.21 (0.71, 2.07) | 0.484 | 1.24 (0.72, 2.13) | 0.434 | 1.22 (0.71, 2.10) | 0.472 | 1.22 (0.70, 2.11)  | 0.483 |
| Frequent urination   | Any disordered eating | 1.16 (0.62, 2.16) | 0.647 | 1.13 (0.59, 2.18) | 0.712 | 1.14 (0.59, 2.21) | 0.693 | 1.17 (0.60, 2.27) | 0.639 | 1.16 (0.60, 2.25) | 0.660 | 1.08 (0.55, 2.12)  | 0.830 |
| Low voided volume    | Any disordered eating | 1.78 (1.08, 2.94) | 0.024 | 1.69 (1.00, 2.86) | 0.051 | 1.67 (0.98, 2.83) | 0.059 | 1.74 (1.02, 2.97) | 0.043 | 1.74 (1.02, 2.97) | 0.043 | 1.65 (0.96, 2.85)  | 0.071 |
| Voiding postponement | Any disordered eating | 1.35 (0.98, 1.86) | 0.065 | 1.33 (0.95, 1.87) | 0.092 | 1.34 (0.95, 1.88) | 0.091 | 1.32 (0.94, 1.86) | 0.106 | 1.29 (0.92, 1.82) | 0.145 | 1.28 (0.90, 1.81)  | 0.166 |
| Nocturia             | Any disordered eating | 1.51 (1.02, 2.22) | 0.037 | 1.59 (1.06, 2.39) | 0.025 | 1.59 (1.05, 2.39) | 0.027 | 1.62 (1.07, 2.44) | 0.022 | 1.61 (1.07, 2.43) | 0.023 | 1.58 (1.04, 2.41)  | 0.032 |

GAD – Generalised Anxiety Disorder; ICD-10 - International Classification of Diseases, Tenth Revision. †Analyses performed on n=1494 due to 34 observations being dropped (underweight BMI predicted outcome perfectly).

Adjusted 1 confounders: sex. Adjusted 2 confounders: sex and socioeconomic indicators (parental occupational social class, maternal educational attainment, family size, ethnicity, home ownership status, material hardship). Adjusted 3 confounders: sex, socioeconomic indicators, child IQ and developmental level. Adjusted 4 confounders: sex, socioeconomic indicators, child IQ, developmental level, maternal stressful life events, maternal depression and maternal anxiety. Adjusted 5 confounders: sex, socioeconomic indicators, child IQ, developmental level, maternal stressful life events, maternal depression, maternal anxiety, child Body Mass Index and earlier emotional/behaviour problems (fully adjusted model).

**Table S8. Sequential adjustments for secondary outcomes using imputed data (n=7,332)**

| Exposure                               | Outcome          | Unadjusted         |      | Adjusted 1         |      | Adjusted 2         |      | Adjusted 3         |      | Adjusted 4         |      | Adjusted 5         |      |
|----------------------------------------|------------------|--------------------|------|--------------------|------|--------------------|------|--------------------|------|--------------------|------|--------------------|------|
|                                        |                  | B (95% CI)         | p    | B (95% CI)         | p    | B (95% CI)         | p    | B (95% CI)         | p    | B (95% CI)         | p    | B (95% CI)         | p    |
| Daytime wetting                        | Physical anxiety | 2.15 (0.77, 3.52)  | 0.00 | 1.19 (-0.16, 2.54) | 0.08 | 1.13 (-0.20, 2.45) | 0.09 | 1.10 (-0.23, 2.43) | 0.10 | 0.99 (-0.34, 2.32) | 0.14 | 0.92 (-0.42, 2.25) | 0.17 |
|                                        |                  | 0.19 (-1.51, 1.89) | 0.82 | 0.42 (-1.23, 2.08) | 0.61 | 0.32 (-1.31, 1.95) | 0.70 | 0.30 (-1.34, 1.93) | 0.72 | 0.29 (-1.35, 1.93) | 0.73 | 0.16 (-1.48, 1.81) | 0.84 |
| Bedwetting                             | Physical anxiety | 2.26 (1.04, 3.47)  | <.00 | 1.51 (0.32, 2.69)  | 0.01 | 1.47 (0.29, 2.65)  | 0.01 | 1.42 (0.23, 2.60)  | 0.01 | 1.36 (0.17, 2.54)  | 0.02 | 1.34 (0.15, 2.52)  | 0.02 |
|                                        |                  | 1.93 (0.69, 3.16)  | 0.00 | 1.67 (0.44, 2.89)  | 0.00 | 1.59 (0.35, 2.82)  | 0.01 | 1.53 (0.29, 2.77)  | 0.01 | 1.44 (0.19, 2.68)  | 0.02 | 1.36 (0.12, 2.60)  | 0.03 |
| Soiling                                | Physical anxiety | 1.10 (-0.51, 2.70) | 0.17 | 0.80 (-0.77, 2.38) | 0.31 | 0.76 (-0.78, 2.31) | 0.33 | 0.71 (-0.84, 2.26) | 0.36 | 0.64 (-0.91, 2.20) | 0.41 | 0.60 (-0.94, 2.15) | 0.44 |
|                                        |                  | 1.94 (0.56, 3.31)  | 0.00 | 1.56 (0.20, 2.91)  | 0.02 | 1.58 (0.23, 2.92)  | 0.02 | 1.55 (0.21, 2.90)  | 0.02 | 1.48 (0.13, 2.83)  | 0.03 | 1.43 (0.08, 2.79)  | 0.03 |
| Urgency                                | Physical anxiety | 1.89 (1.17, 2.61)  | <.00 | 1.75 (1.05, 2.45)  | <.00 | 1.72 (1.02, 2.41)  | <.00 | 1.71 (1.02, 2.41)  | <.00 | 1.67 (0.98, 2.36)  | <.00 | 1.64 (0.95, 2.33)  | <.00 |
|                                        |                  | 1.10 (0.20, 2.00)  | 0.01 | 0.95 (0.07, 1.84)  | 0.03 | 0.91 (0.03, 1.79)  | 0.04 | 0.87 (-0.01, 1.75) | 0.05 | 0.84 (-0.05, 1.72) | 0.06 | 0.81 (-0.07, 1.69) | 0.07 |
| Frequent urination                     | Physical anxiety | 2.15 (0.77, 3.52)  | 0.00 | 1.19 (-0.16, 2.54) | 0.08 | 1.13 (-0.20, 2.45) | 0.09 | 1.10 (-0.23, 2.43) | 0.10 | 0.99 (-0.34, 2.32) | 0.14 | 0.92 (-0.42, 2.25) | 0.17 |
|                                        |                  | 0.19 (-1.51, 1.89) | 0.82 | 0.42 (-1.23, 2.08) | 0.61 | 0.32 (-1.31, 1.95) | 0.70 | 0.30 (-1.34, 1.93) | 0.72 | 0.29 (-1.35, 1.93) | 0.73 | 0.16 (-1.48, 1.81) | 0.84 |
| Low voided volume voiding postponement | Physical anxiety | 2.26 (1.04, 3.47)  | <.00 | 1.51 (0.32, 2.69)  | 0.01 | 1.47 (0.29, 2.65)  | 0.01 | 1.42 (0.23, 2.60)  | 0.01 | 1.36 (0.17, 2.54)  | 0.02 | 1.34 (0.15, 2.52)  | 0.02 |
|                                        |                  | 1.93 (0.69, 3.16)  | 0.00 | 1.67 (0.44, 2.89)  | 0.00 | 1.59 (0.35, 2.82)  | 0.01 | 1.53 (0.29, 2.77)  | 0.01 | 1.44 (0.19, 2.68)  | 0.02 | 1.36 (0.12, 2.60)  | 0.03 |
| Nocturia                               | Physical anxiety | 1.10 (-0.51, 2.70) | 0.17 | 0.80 (-0.77, 2.38) | 0.31 | 0.76 (-0.78, 2.31) | 0.33 | 0.71 (-0.84, 2.26) | 0.36 | 0.64 (-0.91, 2.20) | 0.41 | 0.60 (-0.94, 2.15) | 0.44 |
|                                        |                  | 1.94 (0.56, 3.31)  | 0.00 | 1.56 (0.20, 2.91)  | 0.02 | 1.58 (0.23, 2.92)  | 0.02 | 1.55 (0.21, 2.90)  | 0.02 | 1.48 (0.13, 2.83)  | 0.03 | 1.43 (0.08, 2.79)  | 0.03 |

  

| Exposure        | Outcome        | Unadjusted         |      | Adjusted 1         |      | Adjusted 2         |      | Adjusted 3         |      | Adjusted 4         |      | Adjusted 5         |      |
|-----------------|----------------|--------------------|------|--------------------|------|--------------------|------|--------------------|------|--------------------|------|--------------------|------|
|                 |                | B (95% CI)         | p    | B (95% CI)         | p    | B (95% CI)         | p    | B (95% CI)         | p    | B (95% CI)         | p    | B (95% CI)         | p    |
| Daytime wetting | Mental anxiety | 1.58 (0.65, 2.51)  | 0.00 | 1.41 (0.48, 2.33)  | 0.00 | 1.32 (0.40, 2.25)  | 0.00 | 1.31 (0.39, 2.24)  | 0.00 | 1.23 (0.30, 2.17)  | 0.01 | 1.08 (0.15, 2.02)  | 0.02 |
|                 |                | 0.65 (-0.52, 1.83) | 0.27 | 0.70 (-0.48, 1.87) | 0.24 | 0.60 (-0.57, 1.78) | 0.31 | 0.60 (-0.57, 1.77) | 0.31 | 0.59 (-0.58, 1.77) | 0.32 | 0.37 (-0.80, 1.55) | 0.53 |
| Bedwetting      | Mental anxiety | 1.43 (0.59, 2.28)  | 0.00 | 1.29 (0.45, 2.14)  | 0.00 | 1.27 (0.42, 2.11)  | 0.00 | 1.27 (0.42, 2.12)  | 0.00 | 1.22 (0.37, 2.07)  | 0.00 | 1.17 (0.32, 2.02)  | 0.00 |
|                 |                | 1.00 (0.16, 1.83)  | 0.01 | 0.95 (0.12, 1.78)  | 0.02 | 0.85 (0.02, 1.69)  | 0.04 | 0.86 (0.03, 1.69)  | 0.04 | 0.79 (-0.05, 1.63) | 0.06 | 0.67 (-0.16, 1.51) | 0.11 |
| Soiling         | Mental anxiety | 0.55 (-0.54, 1.64) | 0.32 | 0.49 (-0.59, 1.58) | 0.37 | 0.44 (-0.63, 1.50) | 0.42 | 0.43 (-0.62, 1.49) | 0.42 | 0.38 (-0.68, 1.44) | 0.47 | 0.29 (-0.77, 1.34) | 0.59 |
|                 |                | 1.60 (0.66, 2.54)  | 0.00 | 1.53 (0.58, 2.47)  | 0.00 | 1.50 (0.55, 2.44)  | 0.00 | 1.50 (0.55, 2.44)  | 0.00 | 1.44 (0.49, 2.39)  | 0.00 | 1.36 (0.41, 2.31)  | 0.00 |
| Urgency         | Mental anxiety | 1.45 (0.99, 1.92)  | <.00 | 1.43 (0.96, 1.89)  | <.00 | 1.38 (0.92, 1.84)  | <.00 | 1.39 (0.93, 1.85)  | <.00 | 1.36 (0.90, 1.82)  | <.00 | 1.31 (0.85, 1.78)  | <.00 |
|                 |                | 0.52 (-0.18, 1.22) | 0.14 | 0.49 (-0.20, 1.19) | 0.16 | 0.44 (-0.25, 1.13) | 0.20 | 0.45 (-0.25, 1.14) | 0.20 | 0.42 (-0.27, 1.11) | 0.23 | 0.34 (-0.35, 1.03) | 0.33 |

  

| Exposure        | Outcome            | Unadjusted        |      | Adjusted 1        |      | Adjusted 2        |      | Adjusted 3        |      | Adjusted 4        |      | Adjusted 5        |      |
|-----------------|--------------------|-------------------|------|-------------------|------|-------------------|------|-------------------|------|-------------------|------|-------------------|------|
|                 |                    | OR (95% CI)       | p    | OR (95% CI)       | p    | OR (95% CI)       | p    | OR (95% CI)       | p    | OR (95% CI)       | p    | OR (95% CI)       | p    |
| Daytime wetting | Self-harm thoughts | 2.48 (1.58, 3.91) | <.00 | 2.16 (1.36, 3.42) | 0.00 | 2.09 (1.30, 3.36) | 0.00 | 2.05 (1.27, 3.30) | 0.00 | 1.96 (1.21, 3.18) | 0.00 | 1.83 (1.12, 2.98) | 0.01 |
|                 |                    | 1.36 (0.70, 2.66) | 0.36 | 1.43 (0.73, 2.80) | 0.30 | 1.31 (0.66, 2.61) | 0.44 | 1.29 (0.64, 2.58) | 0.47 | 1.26 (0.63, 2.53) | 0.51 | 1.14 (0.56, 2.31) | 0.71 |
| Bedwetting      | Self-harm thoughts | 1.70 (1.11, 2.61) | 0.01 | 1.52 (0.98, 2.35) | 0.06 | 1.50 (0.96, 2.33) | 0.07 | 1.45 (0.93, 2.25) | 0.09 | 1.41 (0.90, 2.19) | 0.13 | 1.37 (0.88, 2.14) | 0.16 |
|                 |                    | 1.19 (0.70, 2.03) | 0.50 | 1.14 (0.67, 1.96) | 0.62 | 1.01 (0.59, 1.73) | 0.97 | 0.98 (0.57, 1.67) | 0.93 | 0.93 (0.54, 1.62) | 0.80 | 0.88 (0.51, 1.54) | 0.66 |





Supplementary material for: *Prospective relationships between continence problems and common mental health disorders in adolescents from a UK cohort*

|                      |                    |                    |          |                    |          |                    |          |                    |          |                    |          |                    |          |
|----------------------|--------------------|--------------------|----------|--------------------|----------|--------------------|----------|--------------------|----------|--------------------|----------|--------------------|----------|
| Bedwetting           | Binge-eating       | 1.29 (0.73, 2.28)  | 0.38     | 1.40 (0.77, 2.53)  | 0.26     | 1.32 (0.72, 2.41)  | 0.36     | 1.31 (0.71, 2.40)  | 0.38     | 1.27 (0.69, 2.35)  | 0.43     | 1.15 (0.61, 2.14)  | 0.67     |
| Soiling              | Binge-eating       | 2.06 (1.35, 3.14)  | 0.00     | 1.71 (1.11, 2.64)  | 0.01     | 1.70 (1.10, 2.63)  | 0.01     | 1.65 (1.06, 2.58)  | 0.02     | 1.62 (1.05, 2.52)  | 0.03     | 1.58 (1.02, 2.46)  | 0.04     |
| Urgency              | Binge-eating       | 1.69 (1.05, 2.73)  | 0.03     | 1.60 (0.97, 2.63)  | 0.06     | 1.51 (0.91, 2.52)  | 0.10     | 1.47 (0.88, 2.46)  | 0.14     | 1.42 (0.85, 2.38)  | 0.17     | 1.36 (0.81, 2.28)  | 0.23     |
| Frequent urination   | Binge-eating       | 1.18 (0.66, 2.12)  | 0.58     | 1.09 (0.59, 2.00)  | 0.78     | 1.03 (0.55, 1.90)  | 0.93     | 1.00 (0.54, 1.85)  | 0.99     | 0.98 (0.53, 1.84)  | 0.96     | 0.94 (0.50, 1.75)  | 0.83     |
| Low voided volume    | Binge-eating       | 2.04 (1.31, 3.18)  | 0.00     | 1.88 (1.19, 2.97)  | 0.00     | 1.84 (1.17, 2.91)  | 0.00     | 1.83 (1.15, 2.90)  | 0.01     | 1.85 (1.17, 2.93)  | 0.00     | 1.79 (1.12, 2.85)  | 0.01     |
| Voiding postponement | Binge-eating       | 1.43 (1.06, 1.94)  | 0.02     | 1.39 (1.02, 1.90)  | 0.03     | 1.36 (1.00, 1.87)  | 0.05     | 1.36 (0.99, 1.86)  | 0.05     | 1.35 (0.98, 1.85)  | 0.06     | 1.33 (0.97, 1.83)  | 0.08     |
| Nocturia             | Binge-eating       | 1.65 (1.18, 2.31)  | 0.00     | 1.61 (1.14, 2.29)  | 0.00     | 1.58 (1.11, 2.24)  | 0.01     | 1.54 (1.08, 2.19)  | 0.01     | 1.52 (1.07, 2.17)  | 0.02     | 1.45 (1.01, 2.07)  | 0.04     |
| <b>Exposure</b>      | <b>Outcome</b>     | <b>OR (95% CI)</b> | <b>p</b> | <b>OR (95% CI)</b> | <b>p</b> | <b>OR (95% CI)</b> | <b>p</b> | <b>OR (95% CI)</b> | <b>p</b> | <b>OR (95% CI)</b> | <b>p</b> | <b>OR (95% CI)</b> | <b>p</b> |
| Daytime wetting      | Excessive exercise | 1.77 (1.14, 2.76)  | 0.01     | 1.34 (0.84, 2.14)  | 0.21     | 1.39 (0.86, 2.24)  | 0.18     | 1.46 (0.90, 2.37)  | 0.12     | 1.46 (0.90, 2.36)  | 0.12     | 1.40 (0.86, 2.27)  | 0.17     |
| Bedwetting           | Excessive exercise | 1.43 (0.88, 2.32)  | 0.14     | 1.61 (0.95, 2.71)  | 0.07     | 1.76 (1.03, 3.00)  | 0.04     | 1.81 (1.06, 3.09)  | 0.03     | 1.80 (1.05, 3.09)  | 0.03     | 1.76 (1.01, 3.05)  | 0.04     |
| Soiling              | Excessive exercise | 1.37 (0.95, 1.97)  | 0.09     | 1.09 (0.75, 1.58)  | 0.65     | 1.08 (0.74, 1.57)  | 0.69     | 1.15 (0.78, 1.68)  | 0.48     | 1.14 (0.77, 1.67)  | 0.51     | 1.11 (0.76, 1.64)  | 0.58     |
| Urgency              | Excessive exercise | 0.87 (0.57, 1.33)  | 0.52     | 0.79 (0.51, 1.23)  | 0.30     | 0.84 (0.54, 1.32)  | 0.44     | 0.89 (0.56, 1.40)  | 0.60     | 0.88 (0.56, 1.39)  | 0.59     | 0.87 (0.55, 1.37)  | 0.54     |
| Frequent urination   | Excessive exercise | 1.21 (0.74, 1.99)  | 0.44     | 1.11 (0.66, 1.87)  | 0.68     | 1.18 (0.70, 2.01)  | 0.53     | 1.25 (0.72, 2.15)  | 0.42     | 1.24 (0.72, 2.14)  | 0.43     | 1.21 (0.70, 2.11)  | 0.49     |
| Low voided volume    | Excessive exercise | 1.63 (1.08, 2.45)  | 0.02     | 1.48 (0.95, 2.31)  | 0.08     | 1.53 (0.98, 2.39)  | 0.06     | 1.59 (1.01, 2.49)  | 0.04     | 1.58 (1.00, 2.49)  | 0.04     | 1.56 (0.98, 2.46)  | 0.05     |
| Voiding postponement | Excessive exercise | 1.35 (1.05, 1.75)  | 0.01     | 1.32 (1.01, 1.72)  | 0.04     | 1.35 (1.03, 1.78)  | 0.03     | 1.35 (1.02, 1.78)  | 0.03     | 1.34 (1.02, 1.78)  | 0.03     | 1.36 (1.03, 1.80)  | 0.03     |
| Nocturia             | Excessive exercise | 1.56 (1.16, 2.11)  | 0.00     | 1.54 (1.12, 2.11)  | 0.00     | 1.62 (1.17, 2.23)  | 0.00     | 1.69 (1.22, 2.33)  | 0.00     | 1.69 (1.22, 2.33)  | 0.00     | 1.64 (1.18, 2.28)  | 0.00     |
| <b>Exposure</b>      | <b>Outcome</b>     | <b>OR (95% CI)</b> | <b>p</b> | <b>OR (95% CI)</b> | <b>p</b> | <b>OR (95% CI)</b> | <b>p</b> | <b>OR (95% CI)</b> | <b>p</b> | <b>OR (95% CI)</b> | <b>p</b> | <b>OR (95% CI)</b> | <b>p</b> |
| Daytime wetting      | DSM-5 DE           | 2.35 (1.42, 3.89)  | 0.00     | 1.88 (1.12, 3.14)  | 0.01     | 1.99 (1.17, 3.39)  | 0.01     | 2.06 (1.20, 3.54)  | 0.00     | 2.03 (1.18, 3.49)  | 0.01     | 1.83 (1.04, 3.20)  | 0.03     |
| Bedwetting           | DSM-5 DE           | 1.39 (0.72, 2.70)  | 0.32     | 1.51 (0.76, 3.00)  | 0.23     | 1.47 (0.73, 2.98)  | 0.28     | 1.47 (0.72, 2.97)  | 0.28     | 1.44 (0.71, 2.92)  | 0.31     | 1.25 (0.60, 2.61)  | 0.54     |
| Soiling              | DSM-5 DE           | 2.13 (1.37, 3.32)  | 0.00     | 1.79 (1.13, 2.82)  | 0.01     | 1.85 (1.16, 2.94)  | 0.01     | 1.81 (1.13, 2.91)  | 0.01     | 1.78 (1.10, 2.86)  | 0.01     | 1.72 (1.07, 2.78)  | 0.02     |
| Urgency              | DSM-5 DE           | 1.44 (0.87, 2.37)  | 0.15     | 1.35 (0.81, 2.26)  | 0.24     | 1.21 (0.71, 2.04)  | 0.47     | 1.17 (0.69, 1.98)  | 0.55     | 1.15 (0.68, 1.95)  | 0.59     | 1.09 (0.64, 1.88)  | 0.74     |
| Frequent urination   | DSM-5 DE           | 2.26 (1.27, 4.01)  | 0.00     | 2.15 (1.18, 3.89)  | 0.01     | 2.01 (1.08, 3.71)  | 0.02     | 1.97 (1.06, 3.64)  | 0.03     | 1.94 (1.05, 3.60)  | 0.03     | 1.85 (0.99, 3.47)  | 0.05     |
| Low voided volume    | DSM-5 DE           | 1.85 (1.11, 3.08)  | 0.01     | 1.70 (1.00, 2.89)  | 0.04     | 1.66 (0.97, 2.85)  | 0.06     | 1.68 (0.98, 2.88)  | 0.06     | 1.66 (0.97, 2.86)  | 0.06     | 1.59 (0.91, 2.77)  | 0.09     |
| Voiding postponement | DSM-5 DE           | 1.52 (1.08, 2.14)  | 0.01     | 1.48 (1.05, 2.09)  | 0.02     | 1.45 (1.02, 2.06)  | 0.03     | 1.43 (1.01, 2.03)  | 0.04     | 1.42 (1.00, 2.02)  | 0.05     | 1.40 (0.98, 2.01)  | 0.06     |

Supplementary material for: *Prospective relationships between continence problems and common mental health disorders in adolescents from a UK cohort*

|          |          |                   |           |                   |           |                   |           |                   |           |                   |           |                   |           |
|----------|----------|-------------------|-----------|-------------------|-----------|-------------------|-----------|-------------------|-----------|-------------------|-----------|-------------------|-----------|
| Nocturia | DSM-5 DE | 1.56 (1.06, 2.32) | 0.02<br>6 | 1.53 (1.02, 2.29) | 0.04<br>1 | 1.43 (0.94, 2.16) | 0.09<br>1 | 1.39 (0.92, 2.11) | 0.12<br>1 | 1.38 (0.91, 2.09) | 0.13<br>1 | 1.28 (0.83, 1.97) | 0.25<br>6 |
|----------|----------|-------------------|-----------|-------------------|-----------|-------------------|-----------|-------------------|-----------|-------------------|-----------|-------------------|-----------|

DSM-5 DE- Disordered eating at Diagnostic and Statistical Manual of Mental Disorders, Fifth Edition frequency (at least once a week).

Adjusted 1 confounders: sex. Adjusted 2 confounders: sex and socioeconomic indicators (parental occupational social class, maternal educational attainment, family size, ethnicity, home ownership status, material hardship). Adjusted 3 confounders: sex, socioeconomic indicators, child IQ and developmental level. Adjusted 4 confounders: sex, socioeconomic indicators, child IQ, developmental level, maternal stressful life events, maternal depression and maternal anxiety. Adjusted 5 confounders: sex, socioeconomic indicators, child IQ, developmental level, maternal stressful life events, maternal depression, maternal anxiety, child Body Mass Index and earlier emotional/behaviour problems (fully adjusted model).

**Table S9. Sequential adjustments for secondary outcomes using complete case data (mental health outcomes n=1,528; disordered eating outcomes n=1,375)**

| Exposure                               | Outcome            | Unadjusted          |      | Adjusted 1          |      | Adjusted 2          |      | Adjusted 3          |      | Adjusted 4          |      | Adjusted 5          |      |
|----------------------------------------|--------------------|---------------------|------|---------------------|------|---------------------|------|---------------------|------|---------------------|------|---------------------|------|
|                                        |                    | B (95% CI)          | p    | B (95% CI)          | p    | B (95% CI)          | p    | B (95% CI)          | p    | B (95% CI)          | p    | B (95% CI)          | p    |
| Daytime wetting                        | Physical anxiety   | 1.87 (-0.16, 3.89)  | 0.07 | 1.18 (-0.80, 3.17)  | 0.24 | 1.14 (-0.85, 3.12)  | 0.26 | 1.09 (-0.89, 3.08)  | 0.28 | 1.07 (-0.91, 3.06)  | 0.28 | 1.12 (-0.87, 3.10)  | 0.27 |
|                                        |                    | -1.28 (-3.67, 1.11) | 0.29 | -0.88 (-3.21, 1.46) | 0.46 | -1.15 (-3.49, 1.19) | 0.33 | -1.17 (-3.51, 1.18) | 0.32 | -1.13 (-3.48, 1.21) | 0.34 | -1.23 (-3.58, 1.11) | 0.30 |
| Bedwetting                             | Physical anxiety   | 1.13 (-0.69, 2.94)  | 0.22 | 0.47 (-1.31, 2.25)  | 0.60 | 0.45 (-1.34, 2.23)  | 0.62 | 0.35 (-1.44, 2.14)  | 0.70 | 0.35 (-1.44, 2.14)  | 0.70 | 0.35 (-1.44, 2.13)  | 0.70 |
|                                        |                    |                     | 0.01 |                     | 0.01 |                     | 0.02 |                     | 0.02 |                     | 0.02 |                     | 0.02 |
| Urgency                                | Physical anxiety   | 2.50 (0.60, 4.39)   | 0    | 2.29 (0.44, 4.14)   | 5    | 2.11 (0.25, 3.96)   | 6    | 2.09 (0.24, 3.95)   | 7    | 2.08 (0.22, 3.94)   | 9    | 2.11 (0.25, 3.97)   | 6    |
|                                        |                    | 0.31 (-2.14, 2.76)  | 0.80 | 0.10 (-2.30, 2.50)  | 0.93 | 0.04 (-2.36, 2.44)  | 0.97 | 0.00 (-2.40, 2.40)  | 0.99 | -0.02 (-2.43, 2.38) | 0.98 | 0.01 (-2.39, 2.41)  | 0.99 |
| Frequent urination                     | Physical anxiety   | 1.38 (-0.47, 3.22)  | 0.14 | 0.99 (-0.81, 2.80)  | 0.27 | 1.10 (-0.70, 2.90)  | 0.23 | 1.05 (-0.75, 2.86)  | 0.25 | 1.01 (-0.80, 2.81)  | 0.27 | 0.93 (-0.87, 2.74)  | 0.31 |
|                                        |                    |                     | 0.00 |                     | 0.00 |                     | 0.00 |                     | 0.00 |                     | 0.00 |                     | 0.01 |
| Low voided volume Voiding postponement | Physical anxiety   | 1.65 (0.48, 2.82)   | 6    | 1.60 (0.45, 2.74)   | 6    | 1.56 (0.42, 2.71)   | 8    | 1.59 (0.44, 2.74)   | 7    | 1.56 (0.41, 2.71)   | 8    | 1.52 (0.37, 2.67)   | 0    |
|                                        |                    | -1.04 (-0.29, 2.37) | 0.12 | 1.05 (-0.25, 2.35)  | 0.11 | 1.06 (-0.24, 2.36)  | 0.10 | 1.02 (-0.28, 2.32)  | 0.12 | 1.03 (-0.27, 2.33)  | 0.12 | 1.03 (-0.27, 2.33)  | 0.12 |
| Nocturia                               | Physical anxiety   | 2.37                | 5    | 2.35                | 3    | 2.36                | 9    | 2.32                | 4    | 2.33                | 1    | 2.33                | 0    |
| Exposure                               | Outcome            | B (95% CI)          | p    | B (95% CI)          | p    | B (95% CI)          | p    | B (95% CI)          | p    | B (95% CI)          | p    | B (95% CI)          | p    |
| Daytime wetting                        | Mental anxiety     | 0.97 (-0.32, 2.27)  | 0.14 | 0.93 (-0.37, 2.23)  | 0.15 | 0.87 (-0.43, 2.17)  | 0.18 | 0.87 (-0.43, 2.17)  | 0.19 | 0.84 (-0.46, 2.14)  | 0.20 | 0.80 (-0.50, 2.10)  | 0.22 |
|                                        |                    | -0.70 (-2.23, 0.83) | 0.37 | -0.67 (-2.21, 0.86) | 0.38 | -0.80 (-2.33, 0.74) | 0.30 | -0.79 (-2.32, 0.75) | 0.31 | -0.77 (-2.30, 0.76) | 0.32 | -0.94 (-2.47, 0.59) | 0.23 |
| Bedwetting                             | Mental anxiety     | 1.09 (-0.07, 2.25)  | 0.06 | 1.06 (-0.11, 2.22)  | 0.07 | 1.03 (-0.13, 2.20)  | 0.08 | 1.03 (-0.14, 2.20)  | 0.08 | 1.03 (-0.14, 2.20)  | 0.08 | 0.96 (-0.20, 2.13)  | 0.10 |
|                                        |                    |                     | 0.02 |                     | 0.02 |                     | 0.02 |                     | 0.02 |                     | 0.03 |                     | 0.03 |
| Urgency                                | Mental anxiety     | 1.39 (0.18, 2.60)   | 4    | 1.38 (0.17, 2.59)   | 6    | 1.36 (0.15, 2.58)   | 8    | 1.36 (0.15, 2.58)   | 8    | 1.33 (0.12, 2.55)   | 2    | 1.29 (0.08, 2.51)   | 7    |
|                                        |                    | 0.33 (-1.24, 1.90)  | 0.68 | 0.31 (-1.26, 1.88)  | 0.69 | 0.35 (-1.22, 1.92)  | 0.66 | 0.35 (-1.22, 1.93)  | 0.65 | 0.33 (-1.24, 1.90)  | 0.68 | 0.29 (-1.28, 1.85)  | 0.72 |
| Frequent urination                     | Mental anxiety     | 1.29 (0.11, 2.46)   | 2    | 1.26 (0.09, 2.44)   | 6    | 1.25 (0.07, 2.43)   | 8    | 1.23 (0.05, 2.41)   | 1    | 1.19 (0.01, 2.37)   | 8    | 1.11 (-0.07, 2.29)  | 0.06 |
|                                        |                    |                     | 0.00 |                     | 0.00 |                     | 0.00 |                     | 0.00 |                     | 0.00 |                     | 0.00 |
| Low voided volume Voiding postponement | Mental anxiety     | 1.12 (0.37, 1.87)   | 3    | 1.12 (0.37, 1.87)   | 3    | 1.08 (0.33, 1.84)   | 5    | 1.09 (0.34, 1.85)   | 4    | 1.05 (0.30, 1.81)   | 6    | 1.02 (0.27, 1.78)   | 8    |
|                                        |                    | 0.46 (-0.39, 1.31)  | 0.29 | 0.46 (-0.39, 1.31)  | 0.29 | 0.45 (-0.40, 1.30)  | 0.30 | 0.45 (-0.40, 1.30)  | 0.30 | 0.45 (-0.40, 1.30)  | 0.29 | 0.42 (-0.43, 1.27)  | 0.32 |
| Nocturia                               | Mental anxiety     | 1.31                | 4    | 1.31                | 3    | 1.30                | 0    | 1.30                | 0    | 1.30                | 8    | 1.27                | 8    |
| Exposure                               | Outcome            | OR (95% CI)         | p    | OR (95% CI)         | p    | OR (95% CI)         | p    | OR (95% CI)         | p    | OR (95% CI)         | p    | OR (95% CI)         | p    |
| Daytime wetting                        | Self-harm thoughts | 1.94 (0.93, 4.05)   | 0.07 | 1.69 (0.80, 3.54)   | 0.16 | 1.74 (0.82, 3.68)   | 0.14 | 1.72 (0.81, 3.63)   | 0.15 | 1.69 (0.80, 3.58)   | 0.17 | 1.63 (0.76, 3.49)†  | 0.20 |
|                                        |                    |                     | 8    |                     | 8    |                     | 7    |                     | 9    |                     | 1    |                     | 8    |
| Bedwetting                             | Self-harm thoughts | 1.43 (0.55, 3.71)   | 0.46 | 1.58 (0.60, 4.15)   | 0.35 | 1.59 (0.60, 4.22)   | 0.35 | 1.58 (0.59, 4.21)   | 0.36 | 1.60 (0.60, 4.27)   | 0.34 | 1.39 (0.51, 3.74)†  | 0.52 |
|                                        |                    |                     | 4    |                     | 0    |                     | 2    |                     | 1    |                     | 8    |                     | 0    |
| Soiling                                | Self-harm thoughts | 2.35 (1.25, 4.42)   | 0.00 | 2.06 (1.09, 3.90)   | 0.02 | 2.02 (1.06, 3.85)   | 0.03 | 1.98 (1.04, 3.78)   | 0.03 | 2.00 (1.05, 3.83)   | 0.03 | 1.98 (1.03, 3.81)†  | 0.04 |
|                                        |                    |                     | 8    |                     | 5    |                     | 2    |                     | 9    |                     | 5    |                     | 0    |
| Urgency                                | Self-harm thoughts | 1.21 (0.54, 2.71)   | 0.64 | 1.16 (0.52, 2.61)   | 0.72 | 1.11 (0.49, 2.51)   | 0.80 | 1.11 (0.49, 2.51)   | 0.80 | 1.08 (0.47, 2.46)   | 0.85 | 1.05 (0.46, 2.40)†  | 0.90 |
|                                        |                    |                     | 0    |                     | 0    |                     | 3    |                     | 7    |                     | 5    |                     | 8    |

Supplementary material for: *Prospective relationships between continence problems and common mental health disorders in adolescents from a UK cohort*

| Exposure             | Outcome            | Unadjusted         |          | Adjusted 1         |          | Adjusted 2         |          | Adjusted 3         |          | Adjusted 4         |          | Adjusted 5         |          |
|----------------------|--------------------|--------------------|----------|--------------------|----------|--------------------|----------|--------------------|----------|--------------------|----------|--------------------|----------|
|                      |                    | OR (95% CI)        | p        | OR (95% CI)        | p        | OR (95% CI)        | p        | OR (95% CI)        | p        | OR (95% CI)        | p        | OR (95% CI)        | p        |
| Frequent urination   | Self-harm thoughts | 1.52 (0.58, 3.96)  | 0.39     | 1.46 (0.55, 3.83)  | 0.44     | 1.42 (0.53, 3.79)  | 0.48     | 1.40 (0.52, 3.76)  | 0.50     | 1.42 (0.53, 3.80)  | 0.49     | 1.36 (0.50, 3.68)† | 0.54     |
| Low voided volume    | Self-harm thoughts | 1.52 (0.74, 3.14)  | 0.25     | 1.41 (0.68, 2.92)  | 0.35     | 1.42 (0.68, 2.97)  | 0.34     | 1.39 (0.66, 2.90)  | 0.38     | 1.37 (0.65, 2.87)  | 0.40     | 1.26 (0.60, 2.65)† | 0.54     |
| Voiding postponement | Self-harm thoughts | 1.42 (0.88, 2.30)  | 0.15     | 1.41 (0.87, 2.29)  | 0.16     | 1.38 (0.84, 2.25)  | 0.20     | 1.39 (0.85, 2.28)  | 0.18     | 1.35 (0.82, 2.22)  | 0.23     | 1.30 (0.79, 2.15)† | 0.29     |
| Nocturia             | Self-harm thoughts | 1.90 (1.15, 3.14)  | 0.01     | 1.92 (1.16, 3.19)  | 0.01     | 1.94 (1.16, 3.23)  | 0.01     | 1.92 (1.15, 3.20)  | 0.01     | 1.90 (1.14, 3.18)  | 0.01     | 1.90 (1.13, 3.19)† | 0.01     |
| <b>Exposure</b>      | <b>Outcome</b>     | <b>OR (95% CI)</b> | <b>p</b> | <b>OR (95% CI)</b> | <b>p</b> | <b>OR (95% CI)</b> | <b>p</b> | <b>OR (95% CI)</b> | <b>p</b> | <b>OR (95% CI)</b> | <b>p</b> | <b>OR (95% CI)</b> | <b>p</b> |
| Daytime wetting      | Fasting            | 1.01 (0.39, 2.60)  | 0.98     | 0.80 (0.31, 2.08)  | 0.64     | 0.85 (0.33, 2.22)  | 0.73     | 0.78 (0.30, 2.06)  | 0.62     | 0.74 (0.28, 1.97)  | 0.55     | 0.64 (0.24, 1.71)♦ | 0.37     |
| Bedwetting           | Fasting            | 1.35 (0.52, 3.52)  | 0.54     | 1.49 (0.55, 4.00)  | 0.43     | 1.50 (0.55, 4.06)  | 0.42     | 1.40 (0.51, 3.84)  | 0.51     | 1.42 (0.51, 3.91)  | 0.50     | 1.10 (0.38, 3.13)♦ | 0.86     |
| Soiling              | Fasting            | 1.85 (0.96, 3.53)  | 0.06     | 1.62 (0.84, 3.14)  | 0.15     | 1.73 (0.88, 3.38)  | 0.11     | 1.57 (0.80, 3.09)  | 0.18     | 1.57 (0.80, 3.10)  | 0.19     | 1.58 (0.79, 3.13)♦ | 0.19     |
| Urgency              | Fasting            | 2.13 (1.13, 4.01)  | 0.01     | 2.07 (1.08, 3.97)  | 0.02     | 2.09 (1.08, 4.05)  | 0.02     | 1.92 (0.98, 3.74)  | 0.05     | 1.85 (0.94, 3.63)  | 0.07     | 1.87 (0.94, 3.72)♦ | 0.07     |
| Frequent urination   | Fasting            | 1.60 (0.70, 3.65)  | 0.26     | 1.58 (0.68, 3.68)  | 0.29     | 1.54 (0.65, 3.63)  | 0.32     | 1.41 (0.59, 3.36)  | 0.43     | 1.40 (0.58, 3.35)  | 0.45     | 1.30 (0.54, 3.13)♦ | 0.56     |
| Low voided volume    | Fasting            | 1.74 (0.89, 3.42)  | 0.10     | 1.62 (0.81, 3.22)  | 0.17     | 1.65 (0.82, 3.30)  | 0.15     | 1.54 (0.76, 3.09)  | 0.23     | 1.56 (0.77, 3.17)  | 0.21     | 1.48 (0.72, 3.01)♦ | 0.28     |
| Voiding postponement | Fasting            | 1.44 (0.91, 2.27)  | 0.11     | 1.41 (0.88, 2.24)  | 0.14     | 1.48 (0.92, 2.36)  | 0.10     | 1.48 (0.92, 2.39)  | 0.10     | 1.43 (0.89, 2.32)  | 0.14     | 1.39 (0.86, 2.26)♦ | 0.17     |
| Nocturia             | Fasting            | 1.58 (0.92, 2.69)  | 0.09     | 1.63 (0.94, 2.82)  | 0.08     | 1.57 (0.90, 2.74)  | 0.11     | 1.50 (0.85, 2.62)  | 0.16     | 1.47 (0.84, 2.58)  | 0.17     | 1.40 (0.79, 2.49)♦ | 0.24     |
| <b>Exposure</b>      | <b>Outcome</b>     | <b>OR (95% CI)</b> | <b>p</b> | <b>OR (95% CI)</b> | <b>p</b> | <b>OR (95% CI)</b> | <b>p</b> | <b>OR (95% CI)</b> | <b>p</b> | <b>OR (95% CI)</b> | <b>p</b> | <b>OR (95% CI)</b> | <b>p</b> |
| Daytime wetting      | Purging            | 2.16 (0.83, 5.64)  | 0.11     | 1.74 (0.66, 4.59)  | 0.26     | 1.79 (0.67, 4.76)  | 0.24     | 1.81 (0.68, 4.83)  | 0.23     | 1.73 (0.64, 4.64)  | 0.27     | 1.58 (0.58, 4.30)♦ | 0.37     |
| Bedwetting           | Purging            | 1.58 (0.47, 5.26)  | 0.45     | 1.73 (0.51, 5.90)  | 0.38     | 1.60 (0.46, 5.53)  | 0.46     | 1.65 (0.48, 5.72)  | 0.43     | 1.52 (0.44, 5.32)  | 0.51     | 1.30 (0.36, 4.65)♦ | 0.68     |
| Soiling              | Purging            | 2.06 (0.91, 4.67)  | 0.08     | 1.81 (0.79, 4.14)  | 0.16     | 1.86 (0.80, 4.31)  | 0.14     | 1.87 (0.80, 4.36)  | 0.14     | 1.91 (0.82, 4.47)  | 0.13     | 1.89 (0.80, 4.45)♦ | 0.14     |
| Urgency              | Purging            | 1.77 (0.74, 4.24)  | 0.20     | 1.69 (0.70, 4.08)  | 0.24     | 1.62 (0.66, 3.96)  | 0.29     | 1.60 (0.65, 3.96)  | 0.30     | 1.55 (0.63, 3.85)  | 0.34     | 1.55 (0.62, 3.88)♦ | 0.34     |
| Frequent urination   | Purging            | 1.26 (0.38, 4.17)  | 0.70     | 1.23 (0.37, 4.11)  | 0.74     | 1.14 (0.33, 3.86)  | 0.83     | 1.14 (0.33, 3.88)  | 0.83     | 1.10 (0.32, 3.80)  | 0.88     | 1.01 (0.29, 3.53)♦ | 0.98     |
| Low voided volume    | Purging            | 2.17 (0.96, 4.93)  | 0.06     | 2.01 (0.88, 4.63)  | 0.09     | 2.08 (0.90, 4.82)  | 0.08     | 2.10 (0.91, 4.89)  | 0.08     | 2.11 (0.90, 4.92)  | 0.08     | 1.98 (0.84, 4.64)♦ | 0.11     |
| Voiding postponement | Purging            | 1.36 (0.73, 2.53)  | 0.32     | 1.32 (0.71, 2.47)  | 0.38     | 1.34 (0.72, 2.52)  | 0.35     | 1.33 (0.71, 2.50)  | 0.37     | 1.25 (0.66, 2.37)  | 0.49     | 1.22 (0.64, 2.31)♦ | 0.54     |
| Nocturia             | Purging            | 2.13 (1.12, 4.08)  | 0.02     | 2.20 (1.14, 4.25)  | 0.01     | 2.11 (1.08, 4.11)  | 0.02     | 2.11 (1.08, 4.13)  | 0.02     | 2.08 (1.06, 4.08)  | 0.03     | 2.01 (1.02, 3.97)♦ | 0.04     |
| <b>Exposure</b>      | <b>Outcome</b>     | <b>OR (95% CI)</b> | <b>p</b> | <b>OR (95% CI)</b> | <b>p</b> | <b>OR (95% CI)</b> | <b>p</b> | <b>OR (95% CI)</b> | <b>p</b> | <b>OR (95% CI)</b> | <b>p</b> | <b>OR (95% CI)</b> | <b>p</b> |
| Daytime wetting      | Binge-eating       | 3.14 (1.62, 6.11)  | 0.00     | 2.66 (1.35, 5.23)  | 0.00     | 2.74 (1.38, 5.43)  | 0.00     | 2.79 (1.40, 5.54)  | 0.00     | 2.71 (1.36, 5.41)  | 0.00     | 2.39 (1.18, 4.83)  | 0.01     |

Supplementary material for: *Prospective relationships between continence problems and common mental health disorders in adolescents from a UK cohort*

|                      |                    | Unadjusted        |      | Adjusted 1        |      | Adjusted 2        |      | Adjusted 3        |      | Adjusted 4        |      | Adjusted 5        |      |
|----------------------|--------------------|-------------------|------|-------------------|------|-------------------|------|-------------------|------|-------------------|------|-------------------|------|
| Bedwetting           | Binge-eating       | 0.94 (0.33, 2.70) | 0.91 | 1.00 (0.35, 2.92) | 0.99 | 0.96 (0.33, 2.81) | 0.94 | 0.98 (0.33, 2.86) | 0.96 | 0.98 (0.33, 2.86) | 0.96 | 0.75 (0.25, 2.25) | 0.60 |
| Soiling              | Binge-eating       | 1.16 (0.56, 2.38) | 0.68 | 1.03 (0.49, 2.13) | 0.94 | 1.02 (0.49, 2.12) | 0.96 | 1.02 (0.49, 2.14) | 0.96 | 1.02 (0.48, 2.13) | 0.96 | 0.96 (0.45, 2.02) | 0.90 |
| Urgency              | Binge-eating       | 1.20 (0.58, 2.48) | 0.61 | 1.15 (0.55, 2.39) | 0.71 | 1.15 (0.55, 2.41) | 0.70 | 1.14 (0.54, 2.40) | 0.72 | 1.11 (0.52, 2.34) | 0.78 | 1.07 (0.50, 2.27) | 0.86 |
| Frequent urination   | Binge-eating       | 1.20 (0.50, 2.88) | 0.68 | 1.17 (0.48, 2.85) | 0.72 | 1.20 (0.49, 2.93) | 0.69 | 1.20 (0.49, 2.95) | 0.68 | 1.19 (0.48, 2.92) | 0.70 | 1.12 (0.45, 2.77) | 0.80 |
| Low voided volume    | Binge-eating       | 2.39 (1.31, 4.37) | 0.00 | 2.27 (1.23, 4.20) | 0.00 | 2.27 (1.22, 4.21) | 0.00 | 2.31 (1.24, 4.29) | 0.00 | 2.35 (1.26, 4.40) | 0.00 | 2.27 (1.21, 4.28) | 0.01 |
| Voiding postponement | Binge-eating       | 1.29 (0.82, 2.02) | 0.27 | 1.26 (0.79, 1.99) | 0.32 | 1.27 (0.80, 2.02) | 0.30 | 1.26 (0.79, 2.00) | 0.32 | 1.21 (0.76, 1.93) | 0.41 | 1.20 (0.75, 1.91) | 0.45 |
| Nocturia             | Binge-eating       | 1.52 (0.90, 2.57) | 0.11 | 1.56 (0.92, 2.65) | 0.10 | 1.57 (0.92, 2.68) | 0.09 | 1.57 (0.92, 2.69) | 0.09 | 1.56 (0.91, 2.67) | 0.10 | 1.49 (0.86, 2.56) | 0.15 |
|                      |                    |                   | 3    |                   | 2    |                   | 8    |                   | 7    |                   | 4    |                   | 4    |
| Exposure             | Outcome            | OR (95% CI)       | p    | OR (95% CI)       | p    | OR (95% CI)       | p    | OR (95% CI)       | p    | OR (95% CI)       | p    | OR (95% CI)       | p    |
| Daytime wetting      | Excessive exercise | 2.07 (1.12, 3.82) | 0.02 | 1.69 (0.90, 3.18) | 0.10 | 1.69 (0.89, 3.19) | 0.10 | 1.81 (0.95, 3.43) | 0.06 | 1.81 (0.96, 3.44) | 0.06 | 1.74 (0.91, 3.34) | 0.09 |
| Bedwetting           | Excessive exercise | 1.15 (0.53, 2.47) | 0.72 | 1.26 (0.57, 2.79) | 0.56 | 1.27 (0.57, 2.83) | 0.56 | 1.32 (0.59, 2.96) | 0.49 | 1.31 (0.59, 2.95) | 0.50 | 1.21 (0.53, 2.78) | 0.64 |
| Soiling              | Excessive exercise | 1.25 (0.72, 2.18) | 0.42 | 1.09 (0.62, 1.93) | 0.76 | 1.05 (0.59, 1.87) | 0.86 | 1.13 (0.63, 2.02) | 0.67 | 1.13 (0.63, 2.03) | 0.67 | 1.09 (0.60, 1.96) | 0.77 |
| Urgency              | Excessive exercise | 0.75 (0.40, 1.43) | 0.38 | 0.70 (0.36, 1.34) | 0.28 | 0.72 (0.37, 1.39) | 0.32 | 0.76 (0.39, 1.48) | 0.42 | 0.77 (0.40, 1.49) | 0.43 | 0.77 (0.39, 1.51) | 0.44 |
| Frequent urination   | Excessive exercise | 1.15 (0.57, 2.30) | 0.69 | 1.12 (0.55, 2.30) | 0.75 | 1.15 (0.56, 2.36) | 0.71 | 1.21 (0.58, 2.50) | 0.61 | 1.21 (0.58, 2.50) | 0.61 | 1.15 (0.55, 2.40) | 0.71 |
| Low voided volume    | Excessive exercise | 1.56 (0.91, 2.69) | 0.10 | 1.46 (0.83, 2.56) | 0.18 | 1.44 (0.82, 2.53) | 0.20 | 1.54 (0.87, 2.72) | 0.14 | 1.52 (0.86, 2.70) | 0.15 | 1.45 (0.81, 2.58) | 0.21 |
| Voiding postponement | Excessive exercise | 1.42 (1.00, 2.02) | 0.04 | 1.41 (0.98, 2.02) | 0.06 | 1.40 (0.97, 2.01) | 0.07 | 1.38 (0.96, 1.99) | 0.08 | 1.38 (0.95, 1.99) | 0.08 | 1.37 (0.94, 1.99) | 0.09 |
| Nocturia             | Excessive exercise | 1.39 (0.91, 2.13) | 0.12 | 1.44 (0.93, 2.24) | 0.10 | 1.48 (0.95, 2.31) | 0.08 | 1.55 (0.99, 2.42) | 0.05 | 1.55 (0.99, 2.43) | 0.05 | 1.55 (0.99, 2.44) | 0.05 |
|                      |                    |                   | 7    |                   | 5    |                   | 2    |                   | 5    |                   | 3    |                   | 7    |
| Exposure             | Outcome            | OR (95% CI)       | p    | OR (95% CI)       | p    | OR (95% CI)       | p    | OR (95% CI)       | p    | OR (95% CI)       | p    | OR (95% CI)       | p    |
| Daytime wetting      | DSM-5 DE           | 2.03 (0.93, 4.44) | 0.07 | 1.66 (0.75, 3.69) | 0.20 | 1.83 (0.82, 4.12) | 0.14 | 1.82 (0.81, 4.10) | 0.15 | 1.80 (0.80, 4.06) | 0.15 | 1.50 (0.65, 3.47) | 0.34 |
| Bedwetting           | DSM-5 DE           | 0.85 (0.26, 2.79) | 0.78 | 0.91 (0.27, 3.04) | 0.87 | 0.87 (0.26, 2.98) | 0.83 | 0.88 (0.26, 3.00) | 0.83 | 0.88 (0.26, 3.02) | 0.84 | 0.64 (0.18, 2.28) | 0.49 |
| Soiling              | DSM-5 DE           | 1.87 (0.96, 3.67) | 0.06 | 1.66 (0.84, 3.29) | 0.14 | 1.74 (0.86, 3.51) | 0.12 | 1.69 (0.83, 3.42) | 0.14 | 1.68 (0.83, 3.42) | 0.14 | 1.58 (0.77, 3.23) | 0.21 |
| Urgency              | DSM-5 DE           | 1.11 (0.50, 2.49) | 0.79 | 1.06 (0.47, 2.38) | 0.89 | 1.04 (0.45, 2.39) | 0.92 | 0.98 (0.42, 2.26) | 0.95 | 0.96 (0.41, 2.24) | 0.92 | 0.93 (0.40, 2.18) | 0.87 |
| Frequent urination   | DSM-5 DE           | 2.14 (0.98, 4.71) | 0.05 | 2.14 (0.95, 4.79) | 0.06 | 2.23 (0.98, 5.08) | 0.05 | 2.19 (0.96, 5.02) | 0.06 | 2.16 (0.94, 4.97) | 0.06 | 2.09 (0.91, 4.83) | 0.08 |
| Low voided volume    | DSM-5 DE           | 1.75 (0.87, 3.53) | 0.11 | 1.64 (0.80, 3.33) | 0.17 | 1.68 (0.81, 3.45) | 0.16 | 1.67 (0.81, 3.45) | 0.16 | 1.65 (0.80, 3.41) | 0.17 | 1.53 (0.73, 3.24) | 0.26 |
|                      |                    |                   | 5    |                   | 5    |                   | 1    |                   | 8    |                   | 9    |                   | 0    |

|                      |          | <b>Unadjusted</b> |      | <b>Adjusted 1</b> |      | <b>Adjusted 2</b> |      | <b>Adjusted 3</b> |      | <b>Adjusted 4</b> |      | <b>Adjusted 5</b> |      |
|----------------------|----------|-------------------|------|-------------------|------|-------------------|------|-------------------|------|-------------------|------|-------------------|------|
| Voiding postponement | DSM-5 DE | 1.24 (0.76, 2.03) | 0.39 | 1.21 (0.73, 1.99) | 0.46 | 1.27 (0.76, 2.13) | 0.35 | 1.25 (0.75, 2.09) | 0.38 | 1.20 (0.71, 2.01) | 0.49 | 1.17 (0.70, 1.98) | 0.54 |
|                      |          |                   | 2    |                   | 2    |                   | 2    |                   | 7    |                   | 4    |                   | 7    |
|                      |          |                   | 0.23 |                   | 0.21 |                   | 0.25 |                   | 0.27 |                   | 0.28 |                   | 0.39 |
| Nocturia             | DSM-5 DE | 1.42 (0.80, 2.52) | 1    | 1.45 (0.81, 2.60) | 3    | 1.42 (0.78, 2.58) | 1    | 1.40 (0.77, 2.55) | 2    | 1.39 (0.76, 2.54) | 2    | 1.31 (0.71, 2.42) | 0    |

DSM-5 DE- Disordered eating at Diagnostic and Statistical Manual of Mental Disorders, Fifth Edition frequency (at least once a week). †Analyses performed on n=1494 due to 34 observations being dropped (underweight BMI predicted outcome perfectly). ♦Analyses performed on n=1349 due to 26 observations being dropped (underweight BMI predicted outcome perfectly).

Adjusted 1 confounders: sex. Adjusted 2 confounders: sex and socioeconomic indicators (parental occupational social class, maternal educational attainment, family size, ethnicity, home ownership status, material hardship). Adjusted 3 confounders: sex, socioeconomic indicators, child IQ and developmental level. Adjusted 4 confounders: sex, socioeconomic indicators, child IQ, developmental level, maternal stressful life events, maternal depression and maternal anxiety. Adjusted 5 confounders: sex, socioeconomic indicators, child IQ, developmental level, maternal stressful life events, maternal depression, maternal anxiety, child Body Mass Index and earlier emotional/behaviour problems (fully adjusted model).
